1 Title:

2 **Genome-wide transposon mutagenesis of paramyxoviruses reveals constraints on**  
3 **genomic plasticity**

4

5 Short title:

6 **Genomic scale interrogation of paramyxoviruses**

7

8 **Authors**

9 S. Ikegame<sup>1†</sup>, S. M. Beaty<sup>1†</sup>, C. Stevens<sup>1</sup>, S. T. Won<sup>1</sup>, A. Park<sup>1</sup>, D. Sachs<sup>2</sup>, P. Hong<sup>1</sup>, P. A.  
10 Thibault<sup>1\*</sup>, B. Lee<sup>1\*</sup>

11

12 **Affiliations**

13 <sup>1</sup> Department of Microbiology at the Icahn School of Medicine at Mount Sinai, New York, NY  
14 10029, USA.

15 <sup>2</sup> Department of Genetics and Genomic Sciences at the Icahn School of Medicine at Mount Sinai,  
16 New York, NY 10029, USA.

17 \* Correspondence to: [patricia.thibault@usask.ca](mailto:patricia.thibault@usask.ca), [benhur.lee@mssm.edu](mailto:benhur.lee@mssm.edu)

18 † These authors contributed equally to this work.

19

20 **Abstract**

21       The antigenic and genomic stability of paramyxoviruses remains a mystery. Here, we evaluate the  
22 genetic plasticity of Sendai virus (SeV) and mumps virus (MuV), sialic acid-using paramyxoviruses that  
23 infect mammals from two *Paramyxoviridae* subfamilies (*Orthoparamyxovirinae* and *Rubulavirinae*). We  
24 performed saturating whole-genome transposon insertional mutagenesis, and identified important  
25 commonalities: disordered regions in the N and P genes near the 3' genomic end were more tolerant to  
26 insertional disruptions; but the envelope glycoproteins were not, highlighting structural constraints that  
27 contribute to the restricted antigenic drift in paramyxoviruses. Nonetheless, when we applied our strategy to  
28 a fusion-defective Newcastle disease virus (*Avulavirinae* subfamily), we could select for F-revertants and  
29 other insertants in the 5' end of the genome. Our genome-wide interrogation of representative  
30 paramyxovirus genomes from all three *Paramyxoviridae* subfamilies provides a family-wide context in  
31 which to explore specific variations within and among paramyxovirus genera and species.

32

### 33 **Introduction**

34       The *Paramyxoviridae* family encompasses a diverse and ever-expanding range of mammalian  
35 pathogens, including such familiar human viruses as measles (MeV), mumps (MuV), parainfluenza, and  
36 henipaviruses (1). Paramyxoviruses (PMVs) are negative-sense, single-stranded RNA viruses with genes  
37 coding for at least six major proteins: nucleocapsid (N), phosphoprotein (P), matrix (M), fusion  
38 glycoprotein (F), receptor binding protein (RBP, formerly designated variously as HN, H, or G), and the  
39 large protein (L) that possesses RNA-dependent RNA polymerase (RdRp) activity (2). In addition, different  
40 virus species encode a host of accessory proteins from the P gene. Others have additional less well-  
41 characterized genes (*e.g.* for small-hydrophobic (SH) proteins in some orthorubulaviruses). Despite  
42 persisting in human populations for centuries, individual PMVs show a remarkable lack of antigenic  
43 variability within the common envelope glycoproteins (F and HN/H/G), and often cross-react to antibodies  
44 raised against closely-related viruses (3-5). For example, the MeV and MuV strains used in the MMR  
45 vaccines have not changed in the last 40 years, and yet are still protective against current field isolates (6).  
46 Indeed, a MuV-like virus isolated from bats (7) is cross-neutralized by mumps-vaccinated human sera (8),  
47 and the latest ICTV classification considers this bat mumps virus as a strain of MuV rather than a new  
48 *Orthorubulavirus* species (2). This is in contrast to the well-known propensity for antigenic drift of  
49 influenza virus, another negative-sense RNA virus, in response to various pressures including host  
50 populations' adaptive immune responses (9).

51       Our lab previously examined the overall genetic plasticity of a vaccine-strain MeV through whole-  
52 genome transposon insertional mutagenesis (10), and found that unlike influenza virus (11), MeV did not  
53 tolerate insertional changes in its surface glycoproteins, F and H. MeV also demonstrated a greater overall  
54 intolerance for mutagenesis throughout its genome, concomitant with the known increased genetic stability  
55 of PMVs (3, 12). However, MeV-H utilizes protein receptors to mediate virus entry (13), while a wide range  
56 of other PMVs use sialic acids (SAs) to facilitate entry (14), like influenza does. Thus, we sought to learn  
57 whether divergent SA-using PMVs would demonstrate a tolerance in their attachment glycoproteins that

58 correlated with the virus family, or with receptor usage, and whether we would observe other genetic  
59 constraints that were similar to those found in MeV.

60 We first generated genome-wide transposon insertional mutagenesis libraries of SeV (genus  
61 *Respirovirus*) and MuV (genus *Orthorubulavirus*) as representative members from the two subfamilies of  
62 *Paramyxoviridae*, *Orthoparamyxovirinae* and *Rubulavirinae*, that infect mammals. We then evaluated  
63 enrichment of transposon abundance across the genome during serial passaging to identify genetic  
64 plasticity—the ability to tolerate transposon insertions without a loss of replicative fitness—at any given  
65 loci. We found that SeV and MuV show similar trends in genetic plasticity, permitting insertions in the 3'-  
66 most N and P genes, and especially in the non-coding untranslated regions (UTRs). We then rescued  
67 representative insertion mutants (insertants) among the most-enriched regions to determine the veracity of  
68 our transposon mutagenesis library screens. In general, insertants in the N and P genes of both viruses were  
69 viable while those elsewhere in the genome were not. Interestingly, in “multiplex” competition assays of  
70 viable insertants, we found that SeV insertants demonstrated a differential fitness hierarchy from what was  
71 observed in the library setting. In contrast, the fitness of MuV insertants was overall consistent with their  
72 enrichment from the original transposon library. Finally, to determine if our experimental strategy had the  
73 power to select for mutants and/or insertants that are vanishingly unlikely to occur naturally, that is, in an  
74 otherwise inaccessible fitness landscape, we generated a transposon mutagenesis library in a Newcastle  
75 disease virus (NDV) background made fusion-defective by a point mutant in its fusion peptide (NDV<sup>Fmut</sup>).  
76 Serial passaging of NDV<sup>Fmut</sup> enriched for F-insertants in the original NDV<sup>Fmut</sup> background that restored  
77 fusion. Interestingly, we also observed an enrichment for an L-insertant that also carried the reversion  
78 mutation restoring the functionality of the fusion peptide. Together with our previous studies on MeV, we  
79 show that the genetic plasticity of PMVs is broadly consistent across different genera regardless of whether  
80 the PMVs use sialic acid-based or protein-based receptors. We also show that our experimental strategy can  
81 be used to access and interrogate arbitrarily distant fitness landscapes. Finally, we identify common

82 insertion-tolerant regions within the PMV genomes that can be exploited for engineering recombinant  
83 PMVs.

## 84 **Results**

### 85 **Sendai virus broadly tolerates insertions in the 3' end of the genome**

86 In order to identify which regions of the SeV genome can best accommodate insertional mutations,  
87 we utilized a *Mu*-transposon insertional mutagenesis strategy (Fig. 1A) to introduce 15 nucleotide (nt)  
88 insertions throughout the SeV genome, which is equivalent to 5 amino acid (aa) insertions if the transposon  
89 lands in an open reading frame (ORF). The insertional mutagenesis library approach is a more disruptive  
90 approach to interrogating the PMV genome, in comparison to single-nucleotide mutagenesis approaches that  
91 are more suited to interrogating single genes. However, insertants induce a severe selective pressure on the  
92 virus, which is helpful for whole-genome interrogation. Briefly, we first generated a SeV genomic plasmid  
93 with an extra 3-nt stop codon added at the end of the EGFP reporter gene (SeV 6n+3). Since PMV genomes  
94 follow the “rule-of-six”, where the entire genome length must be an exact multiple of six (6n) in order to  
95 replicate well (15), SeV 6n+3 should be rescued inefficiently and replicate even less so on its own (Fig. 1B  
96 and data not shown). The same is true for MuV, whose genome we also interrogated similarly in this study  
97 (Fig. 1C). Since our intention was to understand the tolerance of each of the virus’ native genetic regions for  
98 insertions, we then excluded the reporter gene from all downstream analyses. We subjected this SeV 6n+3  
99 plasmid (‘parental 6n+3’ in Fig. 1A) to *Mu*-transposon mutagenesis using optimized conditions to achieve  
100 saturating mutagenesis, ultimately leaving random 15-nt insertions across the genome. Transposon-mutated  
101 genomic plasmid libraries are therefore 6n+18 (Fig. 1A), restoring the “rule-of-six”, and should be more  
102 competent for rescue and replication (Fig. 1B, C). In addition, any genomes that failed to receive the  
103 transposon remain 6n+3 in length; these genomes cannot be rescued well, and ultimately will not be  
104 represented in our sequencing analyses because they lack the transposon sequence. Importantly, the 15-nt  
105 transposon ‘scar’ itself is designed to be translatable in all three reading frames. The SeV 6n+18 insertional  
106 library was rescued in BSRT7 cells with rescue events ( $\sim 3 \times 10^5$ ) equal to approximately 19-fold coverage  
107 of the genome (Supplementary Table S1). Rescued virus from the supernatant was passaged twice in

108 biological triplicates at a low multiplicity of infection (moi) on Vero cells, which should screen for the  
109 replicative fitness of any given insertion. We chose Vero cells – lacking interferon signaling – as a neutral  
110 background to remove confounding antiviral selective pressures in our experiments. In particular, the P gene  
111 encodes the phosphoprotein, an essential co-factor for the viral transcriptase and replicase, but also encodes  
112 accessory proteins to mitigate the host interferon response. In the absence of interferon signaling, insertants  
113 that disrupt accessory proteins are not selected against and we can better explore the structural and  
114 functional plasticity of the phosphoprotein itself. Thereafter, the original library plasmid pool (input),  
115 supernatant from the rescue (P0), and passages (P1, P2) were deep-sequenced and evaluated for the  
116 presence of the 15-nt insertion.

117 In the input plasmid pool, insertions were found at 65.9% of nucleotide sites, and ultimately targeted  
118 ~93% of amino acids throughout the genome (Supplementary Table S1: Library metrics). Importantly,  
119 insertions were distributed evenly across the genome in the plasmid pool (Supplementary Fig. S1),  
120 demonstrating no bias in the input SeV 6n+18 library.

121 We mapped insertion coverage from P0, P1, and P2 onto the SeV genome (Fig. 2A-C) and observed  
122 a clear purifying selection upon passaging, as expected. At P2, we observe a clear enrichment for insertions  
123 in the N and P genes, located at the 3' end of the genome, and a depletion of insertions elsewhere in the  
124 genome. The magnitude and location of insertional enrichment is relatively reproducible between each of  
125 the three replicates seen in Fig. 2D. The consistent preference for insertions in the 3' end of the genome, and  
126 particularly the non-coding region between N and P, is also clear. To determine if there were other broad  
127 patterns to insertant enrichment, we then analyzed the change in insertional frequency from P0 to P2 in the  
128 5' UTR, ORF, and 3' UTR of each viral gene (Fig. 2E). We observed significant enrichment of the 5'UTR-P  
129 over its cognate ORF; similar trends can be seen with the other ORFs and their cognate UTRs when they are  
130 well-represented at P2. HN and L genes have much smaller UTRs and drastically fewer insertants by P2,  
131 making interpretation of their relative enrichments difficult. We also specifically observed that the 5' UTR  
132 of the N gene and 3' UTR of the L gene both show reduced insertions relative to their neighboring regions,

133 indicative of the stringency of the additional roles these regions play as the 3' leader and 5' trailer sequences  
134 of the virus, required for viral genomic amplification.

135

### 136 **Selected SeV insertants have a different fitness hierarchy in focused competition assays**

137 To evaluate the validity of the results from our pooled rescue and passaging experiments, we re-  
138 generated a subset of the most-highly represented SeV 6n+18 single insertants (see Supplementary Table  
139 S2). At times, our choices were dictated by cloning successes as some insertants were inexplicably  
140 refractory to cloning. To begin, we chose two insertants from each of the most-enriched regions (N-ORF, 3'-  
141 UTR-N, 5'-UTR-P, and P-ORF); generally, we chose highly-represented insertants from the original library,  
142 but we also chose insertants that are more evenly distributed across those regions of interest. Since some  
143 insertants did not rescue (Fig. 3A, discussed below) we included an additional N-ORF-1405 insertant to our  
144 panel to maintain representation of highly-enriched regions. Finally, we added the most-enriched insertant  
145 for each of the remaining M, F, HN, and L genes, for a total of thirteen insertants (Fig. 3A). We rescued  
146 each insertant and amplified it separately, monitoring viral replication kinetics (Fig. 3B, C) and peak titer  
147 (Fig. 3A). Two of the insertants (HN-ORF and L-ORF) could not produce infectious virus upon rescue with  
148 our highly-efficient reverse genetics system (Fig. 3A, Supplementary Table S2), and a further three  
149 insertants (N-ORF-1684, M-ORF, and F-ORF) produced peak titers that were too low for downstream  
150 applications (Fig. 3A), indicating that these insertants likely relied on other genomes in the original pool to  
151 complement their defects in replication. The remaining eight insertants grew well relative to wild-type SeV,  
152 and produced sufficient virus for use in our downstream assay.

153 Next, we sought to evaluate the fitness hierarchy of the insertants. Using a multiplex competition  
154 assay that more closely reflects the selective pressures in the passaging library screen, we evaluated if the  
155 insertants' relative abundance in this assay would correlate with either their peak titer or representation in  
156 the original library. So, the eight insertants that could be rescued and replicated well, four each from the N  
157 and P genes (Fig. 3B-C), were pooled at equal titers and used to infect Vero cells at a total moi of 0.01. We

158 then monitored the fitness of the selected insertants in this competitive outgrowth assay by measuring their  
159 expansion over two passages, using MinION long-read sequencing (Fig. 3D, E). To better understand the  
160 biological meaning of our library output (*i.e.*, insert abundance at P2), which assays predicted each other's  
161 outcomes, and where we ranked our selected insertants relative to each other in each assay, we found that  
162 peak titer was tightly-correlated with performance in the competitive outgrowth assay (Fig. 3F), but that  
163 ranking from the library screen did not predict either downstream measure of relative fitness (Fig. 3G). This  
164 suggests that the SeV n+18 screening library output was predictive of insertant viability – *i.e.* whether it is  
165 replication-competent – but not necessarily of relative fitness compared to other genomes. Thereafter, to  
166 determine if the complex epistatic interactions we observed in in SeV apply to other sialic acid-using  
167 paramyxoviruses, we next turned our analysis to the orthorubulavirus MuV.

168

### 169 **Mumps virus is less tolerant to insertional mutagenesis**

170 Using the same rule-of-six-based strategy as we did with SeV (Fig. 1A, C), we generated a MuV  
171 6n+3 parental genome with which to carry out whole-genome transposon insertional mutagenesis and  
172 produced a MuV 6n+18 saturating library of insertants. This library was rescued in BSRT7 cells to ensure a  
173 minimum of ten-fold coverage of the genome ( $>1.6 \times 10^5$  rescue events), then passaged twice on Vero cells  
174 in biological triplicates as was done for the SeV 6n+18 insertional mutagenesis library. Coverage metrics  
175 from deep sequencing are found in Supplementary Table S1 and Supplementary Fig. S2. While nucleotide  
176 and codon coverage of the MuV 6n+18 library was similar to that of SeV 6n+18, there was a much larger  
177 drop-off in coverage in the viable genomes upon rescue (loss of coverage at 38% and 16% of nt positions in  
178 MuV and SeV, respectively, at P0), and an unexpectedly low titer of P0 rescued virus ( $3.2 \times 10^2$  iu/mL *vs.*  
179  $2.2 \times 10^5$  iu/ml for SeV). These initial results suggest that the MuV genome has a much lower overall  
180 tolerance for insertions.

181

### 182 **Mumps virus tolerates insertions in the 3' end of its genome**



183 Due to the low titer from rescue (P0), P1 was carried out at an moi of 0.0001. After two passages,  
184 the MuV 6n+18 library also showed evidence of purifying selection (Fig. 4A-C). We observed some  
185 enrichment for insertions at the 3' end of the genome (N and V/P genes) as was seen with SeV, and a  
186 surprising secondary peak in the F coding region (Fig. 4C). Stream graphs of each passage replicate (Fig.  
187 4D) show that in comparison with SeV, there was more variability in the regions of the MuV 6n+18 library  
188 that were enriched between replicates. This may be a function of the reduced overall coverage of the library,  
189 which may allow for stochastic rescue and amplification of viruses that pass a certain viability threshold.  
190 Finally, in comparing the specific gene regions that permitted insertions (Fig. 4E), we observed a preference  
191 for only certain UTRs over gene coding regions such as the 5' UTRs of V/P and SH.

192

### 193 **Mumps virus competitive outgrowth assay reflects threshold viability of enriched insertants in library** 194 **screen**

195 In order to assess the validity of the MuV 6n+18 library results, we chose the most-highly enriched  
196 insertants overall from the library (Supplementary Table S3), representing the N and V/P regions of the  
197 genome, as well as the F coding region. Once again, we also included the highest represented insertant from  
198 each of the remaining genes (M, HN, and L) in an attempt to more evenly evaluate the library, and rescued  
199 each of these insertants. As with SeV, we were unable to rescue the insertants in M, HN, and L  
200 (Supplementary Table S3, Fig. 5A), but we were surprised to find that the F insertants also could not be  
201 rescued to produce infectious virus. It is likely that these insertants became enriched in the context of the  
202 library at P2 by relying on either compensatory mutations or complementation by other genomes.  
203 Precedence for the latter is demonstrated by the G264R MeV-F mutant: in the context of an adversely  
204 tagged MeV-H where neither wild-type nor G264R MeV-F resulted in syncytia, only viruses with diploid  
205 genomes independently bearing the wild-type and G264R MeV-F are able to form syncytia (16).

206 Once rescued, we evaluated the remaining successful insertants for growth kinetics and peak titers  
207 (Fig. 5A-C), noting that overall these insertants grew well relative to wild-type MuV. We then pooled six of

208 the insertants at equal titers, and infected Vero cells with a total moi of 0.01 in a competitive outgrowth  
209 assay. Because the sequencing resolution afforded by the Oxford Nanopore MinION cannot consistently  
210 distinguish between insertants P-5'UTR-1976 and -1977, which are shifted by only a single nucleotide, we  
211 selected P-5'UTR-1977 for use in the competitive outgrowth assay as it was best-represented in the original  
212 library screening (Supplementary Table S3). Over two passages, we evaluated the distribution of the  
213 insertants (Fig. 5D, E), and unlike SeV, observed a clear dominance of the N coding region insertants –  
214 particularly, N-ORF-1781 – over all the other insertants. The other insertants were only found at 4-40 reads  
215 out of the ~1,000 reads in each sample. N-ORF-1386 is a distant second, but still clearly dominant over the  
216 other clones. These two insertants also showed the highest peak titer in Fig. 5A-C, along with the excluded  
217 P-5'UTR-1976. Evaluating the three assays for correlation by ranking, we determined that peak titer and  
218 competitive outgrowth were best correlated (Fig. 5F), while neither correlated well with the original library  
219 (Fig. 5G) similarly to what we observed with SeV. Cumulatively, this indicates that while the library screen  
220 was valuable for identifying viable insertants, it was not predictive of relative fitness in downstream assays,  
221 whereas fitness in one downstream assay predicts relative fitness in another reasonably well.

222

### 223 **Fusion-defective Newcastle disease virus allows access to novel fitness landscapes**

224 In order to (1) test the selective power of our transposon mutagenesis experimental set-up, and (2)  
225 determine if the consistent enrichment of insertants in the 3' end of the genome is a technical artifact of our  
226 system, we created a fusion-incompetent NDV by changing a naturally occurring NotI site in the fusion  
227 peptide of our NDV genome (see schematic for NDV<sup>Fmut</sup> in Fig. 6A). Recall that our transposon  
228 mutagenesis screen requires that the plasmid encoding the viral genome be free of NotI sites. We  
229 hypothesized that the vast majority of insertants in this fusion-defective (NDV<sup>Fmut</sup>) genomic background  
230 would not be viable and could not be rescued unless (i) the insertant(s) directly compensated for the fusion-  
231 peptide mutation (F<sup>A138T</sup>), and/or (ii) the insertants occurred on a fusion-revertant genome.

232 Our NDV<sup>Fmut</sup> genomic plasmid library had a serendipitous skew in insertions towards the 5' end of  
233 the genome that was not caused by sequencing bias (compare Fig. 6B to 6C). We also observed that this  
234 skew was maintained in the P0 rescue population (Fig. 6D), which reflects the likelihood that a wide range  
235 of NDV insertants were competent for genome amplification and budding. This suggests that NDV, like  
236 SeV, has a high overall capacity for genetic plasticity. However, the P0 infectious titer was extremely low at  
237 10 iu/mL (Supplementary Table S4). This is expected since the vast majority of rescue events from the  
238 NDV<sup>Fmut</sup> genomic library would result in the production of non-infectious virion particles. To further  
239 increase the selection pressure by genetic “bottlenecking”, NDV<sup>Fmut</sup> (6n+18) P1 was carried out at an  
240 extremely low moi ( $<10^{-5}$ ). We observed a clear response to the bottleneck selective pressure upon  
241 subsequent passaging (P1 and P2, Fig. 6E and F), where the capacity for productive entry and fusion is  
242 essential for viral fitness, replication, and eventual amplification under the conditions examined.

243

#### 244 **NDV<sup>Fmut</sup> background selects for compensatory insertants in fusion protein**

245 Remarkably, when we analyzed the insertant enrichment over two passages (Fig. 6D-F,  
246 Supplementary Table S5), we found that a vast majority of insertants were clustered around nts 11867-  
247 11877 in the L gene, with a subset of F insertants clustered around nt 5383 in NDV-F. This unusual  
248 distribution demonstrates that our experimental system is not inherently biased towards selection of  
249 insertants in the 3' end of paramyxovirus genomes. As we had with our previous libraries, we recreated  
250 individual selected insertants and attempted rescue (Supplementary Table S5), but found that only the F-  
251 insertants were competent for virus spread while still maintaining the original F<sup>A138T</sup> fusion-inactivating  
252 mutation in the NDV<sup>Fmut</sup> genome (*e.g.* F-ORF-5367 and F-ORF-5384, Supplementary Table S5). These  
253 insertants correspond to the hinge region between domains III and I in the fusion protein, which has been  
254 implicated in fusion regulation (17). Thus, we identified insertants that specifically compensated for the  
255 alteration of the highly conserved A138 residue in the F-protein fusion peptide.

256

## 257 **Input transposon distribution drives selection of L-insertants associated with F<sup>mut</sup>-revertants**

258 In addition to insertants that directly compensated for our fusion-peptide mutation, our hypothesis  
259 predicts that enrichment of other apparently viable insertants should occur on fusion-revertant genomes.  
260 Any such insertants should also follow the frequency distribution of the original input library. For example,  
261 since the transposon coverage of the input library was skewed towards the 5' end of the NDV<sup>Fmut</sup> genome by  
262 approximately ten-fold relative to the 3' end of the genome (Fig. 6C), then any potential NDV-F<sup>mut</sup>-  
263 reversion and/or compensatory point mutations should also be more likely to occur in accordance with the  
264 probability distribution associated with 5'-skewed insertants. This is relevant when examining the highly-  
265 represented L-insertants. We noted that these insertants' genomes were replication competent in the rescue  
266 cells, but did not produce infectious virus particles (Supplementary Table S5). When we re-examined the  
267 deep sequencing results *in toto* from NDV P2, we further identified high-abundance single nucleotide  
268 mutations in the NDV structural genes (M, F, and HN, the latter now formally designated as RBP (2)).  
269 Since L-ORF -11872 constituted such a high proportion of insertants in P2 (Fig. 6F), we double-plaque-  
270 purified NDV clones directly from P2 supernatant, and fully sequenced a genome containing the L-ORF-  
271 11872 insertant. Any such genomes in P2 are, by definition, viable and capable of spreading. Indeed, we  
272 found that in this clone, among other mutations in the structural genes, our original NDV<sup>Fmut</sup> (F<sup>A138T</sup>) was  
273 reverted to the parental sequence, restoring the NotI sequence (Fig. 6G). While the significance of the other  
274 point mutations is unclear, the apparent fitness of L-ORF-11872 in the library pool is likely due to its co-  
275 occurrence on the same genome as the NDV<sup>Fmut</sup> revertant.

276 While it is also conceivable that the L-insertant reduced the fidelity of the viral polymerase and  
277 permitted accumulation of compensatory mutations in the viral structural genes, several attempts to rescue  
278 this insertant alone (and others genetically nearby; Supplementary Table S5) in the NDV<sup>Fmut</sup> background did  
279 not yield infectious virus, despite providing a wild-type L gene in *trans* during virus rescue to permit some  
280 replication and accumulation of compensatory mutations. In contrast, reversion of the NDV-F<sup>mut</sup> to its wild-  
281 type counterpart (NDV-F<sup>rev</sup>) in the L-ORF-11872 insertant permitted virus rescue, amplification, and

282 syncytia formation (Supplementary Table S5). Thus, reversion of the F<sup>A138T</sup> point mutation was most likely  
283 responsible for the L-insertant's relative fitness within the NDV library.

284

## 285 Discussion

286  
287 In order to explore the genetic plasticity of sialic acid-using paramyxoviruses, we generated  
288 saturating transposon insertional mutagenesis libraries of SeV and MuV, and then rescued and passaged  
289 these libraries to select for relatively fit insertants. We found that both SeV (Fig. 2) and MuV (Fig. 4)  
290 tolerated insertions in the N and P genes, and especially in their untranslated regions. When we rescued  
291 selected clones of the most highly-enriched insertants, we found that overall capacity for rescue correlated  
292 with their original enrichment in the library (Figs. 3 and 5), indicating that the screening libraries  
293 successfully predicted insertant viability and identified broadly-plastic genetic regions. However, in virus  
294 growth and competition assays, both the SeV and MuV insertants showed differential fitness in comparison  
295 to their representation in the original screening library (Figs. 3G, 5G), indicating that abundance within the  
296 screening library only poorly predicts relative fitness of individual genomes. With these libraries, overall we  
297 are able to draw widely-applicable conclusions about the broad genetic plasticity of paramyxoviruses. In  
298 addition, by employing a separate Newcastle disease virus library where we introduced a selective pressure  
299 to bias insertant distribution differently than what was observed with SeV and MuV, we demonstrate the  
300 potential of these libraries for genome-wide interrogation of paramyxovirus fitness landscape.

301 Broadly, the data from these libraries correlate well with our earlier work on insertional mutagenesis  
302 of MeV. Our original intent in adding SeV and MuV libraries to our insertional mutagenesis repertoire was  
303 to identify whether usage of sialic acid would permit greater tolerance to structural change (11) or whether  
304 we would still observe significant constraint on PMV glycoproteins that could explain their well-known  
305 lack of antigenic drift (3) as we saw with MeV (10). We found that SeV and MuV do not show increased  
306 tolerance for insertions in their glycoproteins. This is in contrast to the genetic and structural plasticity  
307 observed in the HA (hemagglutinin) glycoproteins of sialic acid-using Influenza viruses (11, 18), indicating  
308 that receptor usage does not determine tolerance to insertional mutagenesis. Even when we disabled NDV  
309 fusion as a means of forcing change in the virus' structural region, we observed a strong selection for  
310 reversion mutants, and only a lesser accumulation of compensatory insertants. When we tested the viability

311 of individual insertants in these regions with SeV and MuV, we found that these viruses were incompetent  
312 for virus amplification. These observations are consistent with the monoserotypic nature of most PMV  
313 species (3-6, 8), and with careful analysis of evolutionary constraints on PMV fusion proteins (19). Despite  
314 using overlapping receptors, orthomyxoviruses (including influenza viruses) and paramyxoviruses have  
315 significantly different entry strategies; while the influenza virus HA glycoprotein coordinates both receptor  
316 binding and fusion in a single protein, it requires a separate protein (NA, neuraminidase) to release virions  
317 from infected cells. Paramyxoviruses, in contrast, contain neuraminidase (when needed) and receptor  
318 binding activities in a single protein (RBD), while using a separate protein (F) to initiate membrane fusion,  
319 and there is a tightly co-ordinated series of interactions between the RBD and F proteins during virus entry  
320 that likely varies among different paramyxovirus genera (20). This co-ordinated interaction process likely  
321 introduces stringent constraints on both proteins to preserve interactions and capacity for structural  
322 rearrangements that are not present in influenza virus glycoproteins. This further confirms that there are  
323 broad structural constraints on PMV glycoproteins that prevent them from undergoing the antigenic drift  
324 observed in orthomyxoviruses like Influenza A virus (9).

325 All three viruses have high insertant coverage in the input plasmid library, but only SeV and NDV  
326 P0 insertant coverage remained high upon initial rescue, while MuV P0 shows a stark drop-off in total  
327 insertants and a shift in insertant distribution from the input. This is likely a representation of the underlying  
328 genetic plasticity of each genome, rather than an effect of rescue efficiency, based on data from another  
329 genome library screen with Nipah virus (NiV) as a representative of the genus *Henipavirus* (not shown).  
330 Rescue and amplification of NiV transposon mutagenesis libraries was carried out under BSL-4 conditions,  
331 precluding optimization of rescue efficiency to the same degree as we had done with the other PMVs. And  
332 so, while input plasmid insertant coverage was similar in depth and breadth to SeV, MuV, and NDV, only  
333 ~5500 rescue events occurred. Insertant distribution was stochastic due to this low efficiency, but insertants  
334 were detected broadly throughout the genome, demonstrating that poor rescue efficiency does not drive  
335 shifts in insertant distribution. Thus, the change in MuV insertant distribution from input to P0 is likely

336 representative of biological restrictions on whether the genomes could be rescued. SeV and NDV do not  
337 share this level of restriction, indicating that these viruses' genomes are more plastic.

338       Insertant distribution after passaging in the fusion-competent SeV, MuV, and MeV genomes  
339 demonstrate two related patterns of enrichment: firstly, more viable insertants are located towards the 3' end  
340 of these genomes (Figs 2A-C, 4A-C), and secondly, the viruses are generally more enriched for insertants in  
341 the UTRs of the genes than their cognate ORFs, especially in transcriptional units like N and P, where there  
342 is sufficient insertional coverage at P2 to make such comparisons (Figs 2E and 4E). The observation of  
343 increased insertional tolerance in UTRs is not surprising; PMV UTRs play a regulatory role in transcription,  
344 mRNA stability, and translation efficiency, in ways that are not thoroughly characterized, but they are  
345 overall only constrained at the nucleotide level. However, even within this, there is still a clear and  
346 overriding 3' enrichment bias, since HN and L UTRs of SeV, MuV, or MeV do not demonstrate insertant  
347 enrichment. Even the NDV<sup>Fmut</sup> library does not demonstrate an enrichment in these UTRs, despite the  
348 library's input bias and ultimate enrichment for insertants in a presumed "neutral" region of the adjacent L-  
349 ORF. We therefore hypothesize that highly-expressed genes like N and P can tolerate some dysregulation  
350 without significant negative effects, whereas the intolerance to dysregulation of less-abundant genes like F,  
351 H/HN, and L may be an indicator of how stringently-regulated they are. Our studies suggest that the  
352 regulatory functions of these intergenic regions in PMVs (21-24) should be systematically explored in their  
353 appropriate genomic contexts, which is now possible using robust and efficient reverse genetics systems.

354       In SeV and MuV, these enriched UTRs near the 3' end of the genome are co-incidentally near the  
355 eGFP reporter gene, which is between N and P. Nonetheless, this likely reflects an aspect of virus biology  
356 rather than a simple proximity to the reporter gene since we also previously observed an increased tolerance  
357 for insertants in the 3' end of the MeV genome (10). In addition, the eGFP reporter in our NDV reporter  
358 genome is located between P and M, but we do not see enrichment for insertion in those untranslated  
359 regions.



360 We also observed an enrichment for insertions in the coding regions of N and P in our fusion-  
361 competent libraries. Paramyxoviral P proteins code for multiple accessory proteins in different frames by  
362 use of alternative translation start sites (C proteins) and by mRNA editing (V, W), and these proteins are  
363 largely involved in blocking host antiviral sensing and response. Despite the constraint of coding in multiple  
364 frames, we observed enrichment for insertions in all our fusion-competent libraries at the 5' (N-terminus)  
365 end of the P gene, the region common to all the ORFs. However, the C, V, and W proteins of PMVs bear  
366 unstructured regions and are highly variable between virus species and genera (1, 25, 26), while the N-  
367 terminus of P is specifically understood to be intrinsically disordered (27). Together, this may explain the  
368 unexpected insertional tolerance in P. N insertions are also found primarily in the unstructured C-terminus  
369 “N<sub>tail</sub>” region, which has already been shown to accommodate insertions and deletions with limited negative  
370 impact on MeV in tissue culture (28, 29). We thus propose that our transposon mutagenesis enriches for  
371 insertants in such unstructured regions of proteins, since specific functional elements will remain accessible  
372 regardless of upstream and downstream insertions.

373 The NDV<sup>Fmut</sup> library P2 insertants indicate that structural order, however, is not the only determinant  
374 of insertion tolerance in coding regions. Dochow *et al.* produced an analysis of the propensity for disorder  
375 across the MeV L protein as a model for other PMVs, and further tested select predicted unstructured  
376 regions for tolerance to small insertions and epitope tags (30). Although the majority of the NDV L-ORF  
377 was enriched for transposon insertions in the NDV<sup>Fmut</sup> DNA input library, over passage only a small subset  
378 of closely-located L-insertants were viable when combined with revertant F point mutations. Negative-sense  
379 RNA virus polymerases contain six major conserved regions (CRs) flanked by variable regions that differ  
380 between and within virus families. The NDV<sup>Fmut</sup> L-insertants are all within a small portion of CR-IV, the  
381 function of which is not understood. Based on Dochow *et al.*'s analysis, this region is generally ordered, and  
382 so it is not obvious why insertants in this region are more viable. Other nearby portions of L are predicted to  
383 be far more disordered, and in fact an unstructured region near CR-VI has been shown to tolerate both large  
384 epitope tags and a complete break of the polymerase into two separate ORFs, as long as they are brought

385 back into contact by artificial domains (30). While we cannot determine causation within the library setting,  
386 follow-up failed attempts to rescue the L-insertants alone without revertant F mutations does not suggest  
387 that these insertants specifically potentiated acquisition of point mutations; *i.e.* we can find no evidence that  
388 the enriched L-insertants are more error-prone polymerases. Thus, a much more detailed structural analysis  
389 and mutagenesis exploration of NDV-L, as well as other PMV polymerases, will be required to understand  
390 what determines this region's specific tolerance to insertion. It is interesting to note that since this region  
391 was not predicted by structural analyses, a functional insertional mutagenesis assay does still have  
392 information to offer for designing sites for tagging viral proteins or inserting novel tandem ORFs and fusion  
393 proteins.

394 Within this body of work, we compared fitness in the screening libraries with individual insertant  
395 clonal fitness, and competitive fitness in the more-contained competitive outgrowth assays. We found that  
396 relative clonal fitness (as measured by growth curves and peak titer) correlated well with relative fitness in  
397 competitive outgrowth assays, particularly for SeV. However, in the context of the library setting, the  
398 number of insertant reads at P2 appears to be more affected by complex epistatic factors. The ranked  
399 frequency of insertant reads at P2 did not always match their clonal or competitive fitness in more  
400 controlled assays. Altogether, the evidence suggests that the transposon library approach, without the more  
401 careful downstream analyses shown in our studies, is best suited to dissecting viable *vs* non-viable viral  
402 genomes in our assay setting, rather than predicting the relative fitness of individual insertants.

403 By placing our NDV<sup>Fmut</sup> library under a unique form of selective pressure, we drove enrichment of  
404 insertants in otherwise-intolerant regions of the genome – F, a structural protein, and L, the viral  
405 polymerase. Thus, we have demonstrated the power of our strategy to reveal not only the genomic plasticity  
406 of paramyxovirus genomes, but also the ability to use our methods to design arbitrarily selective screening  
407 campaigns to interrogate paramyxovirus biology. Specifically, we envision leveraging our efficient and  
408 robust reverse genetics systems to design and execute selection strategies that can be used to interrogate the  
409 fitness landscapes of individual genes that were previously not accessible using conventional paramyxovirus

410 passaging and selection. Furthermore, we have shown the viability of designing strategies to select for  
411 mutants in fitness landscapes that are otherwise not easily accessible during the normal course of  
412 paramyxovirus evolution.

413 *In toto*, we found common regions of tolerance and intolerance for insertions in PMV genomes,  
414 specifically identifying tolerance to dysregulation of highly-expressed genes. We further noted that there are  
415 structural constraints on changing PMV antigenicity, and that unstructured regions in the N, P, and  
416 accessory proteins permit insertional mutagenesis. We demonstrated that this highly-disruptive whole-  
417 genome insertional mutagenesis library approach could be informative for paramyxoviruses placed under  
418 unique selective pressures: not only such genetic pressures as we used here, but also perturbations like  
419 interferon treatment or amplification in susceptible host animals. Overall, the combined commonalities and  
420 differences in these paramyxovirus mutagenesis libraries provide a broader family-wide context in which to  
421 understand specific variations within PMV genera or species.

422

## Materials and Methods

### Experimental Design.

Our transposon mutagenesis strategy for whole genome interrogation of paramyxoviruses is outlined in Fig. 1 and the accompanying text. It takes advantage of our efficient and robust reverse genetics system (31) and leverages the rule-of-six (15), the latter being a unique feature of paramyxovirus replication. Whole genome insertional mutagenesis libraries were generated for three paramyxoviruses described below, and these libraries were rescued (P0) and passaged (P1, P2) in tissue culture to identify genetic regions that were relatively tolerant to insertion for downstream characterization.

*Research Objectives:* Through this study we sought (i) to identify genetic regions or determinants of plasticity common to sialic-using paramyxoviruses, (ii) to explore how determinants of fitness within library settings correspond to solo and alternative library selective and competitive pressures, and (iii) to test the effects of a defined selective pressure on which genetic regions would demonstrate plasticity.

(i) Genome-wide transposon mutagenesis screens have been carried out on other positive and negative sense RNA viruses, including our own previous study on MeV with similar goals (10).

(ii) Validation of such an approach usually includes only generation of recombinant viruses bearing select enriched insertants to ensure that they are viable. However, in the context of non-segmented negative sense RNA viruses such as PMVs, the replicative fitness of individual insertants derived from a complex pool may not be accurately reflected in their individual growth kinetics and peak titers. To gain a better understanding how the abundance of the insertants identified in the library P2 relate to growth kinetics and replicative fitness, we made recombinant 6n+18 PMVs bearing representative insertants from the relevant genomic regions. We then determined their individual growth kinetics and peak titers, and subjected them to a competitive outgrowth assay. We developed a Nanopore long-read sequencing protocol and bioinformatic pipeline to monitor the outcome of a focused multiplex competitive outgrowth assay. This competitive outgrowth assay revealed substantive differences between how the abundance of the SeV or MuV insertants detected in library P2 Illumina reads relate to their solo replicative fitness and competitive fitness in a more focused assay.

(iii) Finally, to determine that our whole genome transposon mutagenesis screens of paramyxoviruses was not systematically biased towards detecting only 3' end genomic insertants in the N-P gene regions, we applied our screen to a parental 6n+3 NDV genome that was made fusion-defective (NDV<sup>Fmut</sup>) by destroying a naturally occurring NotI site in the genetic region encoding the fusion peptide in NDV-F. To make a *Mu*-transposon mutagenesis library, the parental (6n+3) genomic plasmid has to be devoid of NotI sites. Subjecting the NDV<sup>Fmut</sup> transposon mutagenesis genomic library to rescue and passaging resulted in identification of compensatory F-insertants in an otherwise fusion-defective background, along with a cluster of L-insertants that occurred on a F-revertant fusion-competent background. These results show the power of experimental system to design arbitrarily selective screening campaigns and access distant fitness landscapes to interrogate paramyxovirus biology.

### Units of investigation:

*Viruses:* We selected SeV<sup>Fushimi</sup>, MuV<sup>JL5</sup>, and NDV<sup>LaSota</sup> for use in this study as sialic acid (SA)-using representative viruses of major paramyxovirus subfamilies *Orthoparamyxovirinae*, *Rubulavirinae*, and *Avulavirinae*, respectively. The individual strains were selected based on previous optimization of high-efficiency reverse genetics systems for each virus (31).

*Cells:* We rescued our original transposon mutagenesis libraries in BSRT7 cells (derived from BHK21 cells) since we have achieved maximal rescue efficiency with our reverse genetics systems on these cells (31). We passaged the rescued output (P0) from SeV and MuV in Vero cells for two sequential passages (P1 and P2). Our NDV library was both rescued and amplified in BSRT7 cells since we observed better growth in these cells than in Vero cells. We reasoned that both BSRT7 and Vero cell lines, which are respectively

472 deficient in interferon signaling (32) and interferon production (33), should serve as neutral cellular  
473 backgrounds for our initial genome-wide interrogations. Using these cells removes likely confounding  
474 selective pressures against insertions in the P gene that might disrupt its interferon antagonist function (and  
475 that of P-derived accessory proteins). We did not want to miss insertants in the P gene that might be  
476 structurally tolerated and not affect P's function as a cofactor of the L-mediated transcriptase and replicase  
477 complex.

478  
479 *Sample size/scale:* The rescue efficiency of our reverse genetics system was critical for determining which  
480 paramyxovirus could be interrogated on a genome-wide scale. If transposon insertions were truly random  
481 and not affected by other confounding factors (see footnotes to Supplementary Table S1), Poisson statistics  
482 dictate that a 10X coverage in terms of the number of independent transposon insertants rescued, relative to  
483 the size of the cognate PMV genome, is required to ensure >90% probability that any given nucleotide  
484 position in the genome has at least one insertant, so rescue scale was dictated by each virus' rescue  
485 efficiency as calculated in Supplementary Tables S1 and S4.

486  
487 *Replicates:* Library generation, and library and insertant rescue was carried out in singlicate as an  
488 appropriate use of resources. Insertants whose rescue failed to produce infectious viruses, two additional  
489 rescue attempts were made to verify the insertants' inviability. All other assays were carried out in triplicate  
490 unless otherwise noted to ensure accurate representation of the potential diversity of assay outcomes.

491  
492 *Endpoint:* In all library scenarios and in the multiplex competitive outgrowth assays, the endpoint for each  
493 passage was defined as when the entire culture was infected, as determined by visual observation of GFP-  
494 positivity. For individual insertant rescue, success or failure was determined by whether virus demonstrated  
495 spread in tissue culture within ten days of transfection – monitored by GFP-positivity, and confirmed by  
496 syncytia formation for MuV and NDV. Growth curves were carried out until the wild-type (6n) virus titers  
497 plateaued and began to reduce in magnitude.

498  
499 *Inclusion/Exclusion criteria:* No samples or replicates were discarded from these experiments.  
500 Computational criteria for identifying insertants in deep sequencing results are based on the sequencing  
501 fidelity for the platform used (Illumina and Nanopore), and are otherwise as inclusive as possible to identify  
502 all insertants.

#### 503 504 **Cell lines.**

505 Vero cells (ATCC Cat# CCL-81, RRID:CVCL\_0059), and BSR T7/5 cells (RRID:CVCL\_RW96; (34))  
506 were propagated in Dulbecco's modified Eagle's medium (ThermoFisher Scientific, USA) supplemented  
507 with 10% fetal bovine serum (Atlanta Biologicals, USA) at 37°C. Cell lines were monitored monthly to  
508 maintain mycoplasma-negative status using the MycoAlert Mycoplasma Detection Kit (Lonza, USA).

#### 509 510 **Plasmids and viruses.**

511 Genome coding plasmids for SeV (pSeV<sup>Fushimi</sup>-eGFP; KY295909), MuV (pMuV<sup>JL5</sup>-eGFP; KY295913), and  
512 NDV (pNDV<sup>LaSota</sup>-eGFP; KY295917) were modified to have optimized T7 promoter and hammerhead  
513 ribozyme as previously reported (31). Our recombinant SeV<sup>Fushimi</sup>-eGFP bears mutations in the M and F  
514 genes that enable trypsin independent growth (35). The MuV<sup>JL5</sup>-EGFP strain is derived from the JL5  
515 vaccine strain. NDV-eGFP was based on LaSota strain with mutations in its cleavage site to be cleaved by  
516 urokinase-type plasminogen activator (uPA) (36). In order to attenuate viral genomes that lack the  
517 transposon insertion, we introduced an extra 3nt stop codon after the reporter gene in each construct,  
518 rendering the viral genome 6n+3 nucleotides; these are indicated as SeV 6n+3, MuV 6n+3, and NDV 6n+3.  
519 We also abolished NotI restriction sites in each virus' plasmid in order to facilitate transposon removal. All  
520 modification for plasmids were performed using overlap PCR mutagenesis with InFusion cloning (Takara

521 Biosciences, USA). Viral genome and support plasmids were maintained in chemically-competent Stbl2 *E.*  
522 *coli* cells (ThermoFisher Scientific, USA) with growth at 30°C.  
523 Supplementary Table S6 contains the primer sequences for generating all recombinant insertant plasmid  
524 genomes. Nucleotide position in the genome is labelled without the eGFP transcriptional unit, and insertant  
525 position refers to the nucleotide after which the transposon sequence began. Insertants are named by genetic  
526 region and nucleotide position.

527

### 528 **Transposon-mediated mutagenesis.**

529 The Mutation Generation System (ThermoFisher Scientific, USA) was used to randomly insert transposons  
530 in the 6n+3 genomic plasmids using a modified protocol. An *in vitro* transposon insertion reaction was  
531 performed on approximately 850ng per viral genome plasmid (40ng DNA per kb of plasmid) of 6n+3  
532 genomic plasmids, which were dialyzed twice for 30 min in 1L ddH<sub>2</sub>O, and then transformed into  
533 ElectroSHOX cells (Bioline USA, discontinued). Following transformation, the cells were plated on 20 x  
534 15cm plates with LB agar containing ampicillin (MilliporeSigma, USA) and kanamycin (ThermoFisher  
535 Scientific, USA) (selecting for plasmid transformants and transposon insertion respectively) and allowed to  
536 grow for ~18 hours at 30°C. The bacterial colonies were scraped from the agar with PBS, and pelleted, and  
537 DNA was extracted from the pooled colonies using a PureLink HiPure maxiprep kit (ThermoFisher  
538 Scientific, USA). 30ug of transposon-containing genomic plasmid was digested with NotI-HF (New  
539 England Biolabs, USA) for 3 hours to remove the transposon body. The restricted plasmid was then gel  
540 purified using the Qiaex II kit (Qiagen, USA), and 500 ng of the DNA was re-ligated at 25°C for 30 minutes  
541 using T4 DNA Ligase (New England Biolabs, USA) and heat-inactivated at 65°C for 10 minutes. The entire  
542 ligation mixture was dialyzed for 20 min in 1L ddH<sub>2</sub>O, and then transformed into ElectroSHOX cells and  
543 plated on 20 x 15cm plates containing ampicillin only. After ~18 hours' growth at 30°C, the colonies  
544 containing 6n+3 viral genomes with the transposon scar (6n+18) were again scraped from the plates into  
545 PBS, and the viral 6n+18 genome DNA was again extracted using the HiPure maxiprep kit.

546

### 547 **Rescue of recombinant viruses (P0) from cDNA.**

548 For recovery of recombinant viruses, rescue was performed as described in Beaty *et al.* (2017).  $4 \times 10^5$  BSR  
549 T7/5 cells per well were seeded in 6-well plates. The following day, DNA and Lipofectamine LTX / PLUS  
550 reagent (ThermoFisher Scientific, USA) were combined as indicated in Supplementary Table S7 in  
551 OptiMEM (ThermoFisher Scientific, USA) with gentle mixing by pipetting only. After incubation at room  
552 temperature for 30 minutes, the DNA:lipofectamine mixture was added dropwise onto cells. Separate  
553 transfection reactions were set up for each rescue well. Transfected cells were incubated at 37°C for 8-10  
554 days, until the level of infection reached 100% as determined by observation of GFP-positive cells by  
555 microscopy. Supernatant was collected from rescue cells, pooled, and clarified by centrifugation. Clarified  
556 supernatants were stored at -80°C.

557

558 **Analysis of relative rescue efficiency.** SeV-WT, SeV-parental (6n+3), and SeV-library (6n+18) genomes  
559 were rescued as described in detail above. Two days post-rescue, cells were collected with PBS+50mM  
560 EDTA, pelleted, and re-suspended into 2% paraformaldehyde for fixation. After 15 minutes, cells were  
561 pelleted again, and re-suspended into PBS + 2mM EDTA + 2%FBS. Cells were assayed by flow cytometry  
562 on a BD FACSCantoII with BD FACSDiva v6.0, and evaluated for GFP-positivity in the Blue-1 channel,  
563 relative to un-transfected cells.  $5 \times 10^5$  events were collected for each sample - the equivalent of a full 6-well  
564 well. The WT, parental (6n+3), and libraries (6n+18) for MuV were evaluated the same way.

565

### 566 **Titering viral supernatants.**

567 Titrations of SeV, MuV, and NDV stocks were performed on Vero cells in a 96-well format, with individual  
568 infection events (infectious units, iu/mL) identified by GFP fluorescence at 24 hours post-infection using an  
569 Acumen plate reader (TTP Labtech, USA).

570

571 **Passaging virus for SeV and MuV library screen.**

572  $5.2 \times 10^6$  Vero cells in a 15cm dish were infected at an MOI of 0.01 for each passage and replicate, with the  
573 exception of passage 1 in MuV. We adopted a MOI of 0.0003 (5120 iu/dish) for passage 1 (P1) of MuV,  
574 because P0 titer was very low. Thereafter, infection was monitored by microscopy and supernatants were  
575 collected when the level of infection reached 100% as determined by observation of GFP-positive infected  
576 cells by microscopy, at 8-10 days post-infection (dpi.) Supernatant was collected from rescue cells, pooled,  
577 and clarified by centrifugation. Clarified supernatants were stored at  $-80^\circ\text{C}$ . Screening experiments were  
578 done in triplicate independently.

579

580 **Passaging virus for NDV library screen.**

581 BSRT7 cells were infected with NDV using the same strategy and parameters as with SeV and MuV above.  
582 Since infectious titers from P0 (rescue) of NDV were very low, P1 was carried out at a very low moi  
583 ( $<0.0001$ ) and required several additional days to reach confluence post-infection.

584

585 **RT-PCR and Illumina sequencing for library screen.**

586 The SeV, MuV, and NDV RNA was extracted from thawed supernatant using QIAamp viral RNA  
587 extraction kit (Qiagen, USA). Genomic RNA was then amplified in six equal-sized segments using  
588 overlapping primers sets (Supplementary Table S8) using SuperScript III One-Step RT-PCR kit  
589 (ThermoFisher Scientific, USA) with Platinum Taq. The cDNA segments from each sample were pooled in  
590 equimolar amounts, sheared by Covaris sonication, and prepped for sequencing using TruSeq DNA LT  
591 Sample Prep Kit (Illumina, USA) according to the manufacturer's instructions. Barcoded and multiplexed  
592 samples were sequenced on a HiSeq2000 using 100-nt single-end reads in Rapid Run mode. Analysis of the  
593 transposon insertions was performed as previously described (10).

594

595 **Sequencing analysis of library screen.**

596 Identification of the transposon insertions were carried out as in Heaton *et al.* (11). Briefly, reads with the  
597 transposon scar sequence of TGCGGCCGCA were extracted from the total sequencing data. The scar  
598 sequence was then deleted, leaving a 5nt duplication at the site of insertion. These sequences were then  
599 aligned to the viral reference sequences by bowtie2, and processed sam files were used to identify the  
600 position of insertion in each read.

601

602 **Data analysis and insertant selection from library screens.**

603 Although transposon coverage was overall  $>10$ -fold for both SeV and MuV libraries, individual nucleotide  
604 positions did not always receive an insertion. Thus, all analyses were carried out using a 100nt sliding  
605 window to prevent division by 0. Additionally, raw insertant counts in P1 and P2 are likely to be biased by  
606 varying transposon abundance in the input and rescue (P0) libraries, so we normalized P1 and P2 reads by  
607 the number of insertants in P0, and presented these passages as triplicate average percent reads over P0  
608 (Figs. 2A-C and 4A-C).

609

610 To identify the most highly-enriched individual insertants in the library, we first identified 40 insertants  
611 with the highest overall raw read count at P2 from each library. We then divided these by normalized P0  
612 reads, and eliminated any insertants whose relative abundance drastically decreased over passage (average  
613  $\text{P2/P0} < 30\%$ ) in order to account for variability of coverage in P0. From those remaining, we showed the  
614 top 20 insertants for SeV (Supplementary Table S2), and the insertants that showed an average of 1 or more  
615 reads in MuV (Supplementary Table S3). Individual insertants from these lists were selected for  
616 downstream characterization as described in Results.

617

618 **Insertant rescue and growth curves.**

619 Individual insertant viruses were rescued in BSR T7/5 cells as described above, were amplified in Vero cells  
620 once, and titered as above.  $2 \times 10^5$  Vero cells per well in a 12-well dish were infected at an MOI of 0.01 for  
621 2h, followed by replacement of fresh medium. Samples were collected daily for titration with complete  
622 media exchange.

623

### 624 **Competitive outgrowth assay.**

625 Because individual insertant viruses demonstrated different growth characteristics that could render our  
626 standard titration assay (described above) inaccurate, we titered the individual insertants by focus-forming  
627 assay prior to combining them for a competition outgrowth assay.  $2 \times 10^5$  Vero cells per well in 12-well  
628 plates were inoculated with a serial 10-fold dilution of insertants for 2 hours. Cells were washed with PBS  
629 once and then replaced with an overlay methylcellulose (1% methylcellulose in DMEM plus 2% FBS) to  
630 prevent establishment of secondary foci. At 7 dpi (SeV) or 4 dpi (MuV), the number of eGFP-positive  
631 infectious foci were manually counted using a Nikon Eclipse TE300 inverted fluorescent microscope  
632 (Melville, NY, USA).

633

634 Competitive outgrowth assays were carried out in independent biological triplicates: equal infectious units  
635 as defined by the focus-forming assay above of 8 SeV insertants or 6 MuV insertants were mixed, creating  
636 P0 mixture. Then the titer of each of these mixtures was re-quantified by iu as described above.  $2 \times 10^6$  Vero  
637 cells in a 10 cm dish were infected by the P0 mixture at a final MOI of 0.01. In order to maintain cell  
638 viability, media was exchanged daily until ~100% infection was reached as determined by eGFP-positive  
639 cells by fluorescent microscopy. The supernatant on the day of eGFP confluency was used as the P1 sample.  
640 For P2, supernatant from P1 was titered (by infectious unit), then inoculated at MOI of 0.01 and passaged  
641 until 100% infection as was done for P1.

642

### 643 **RT-PCR and Nanopore sequencing for competitive outgrowth assay.**

644 RNA was extracted from P0, P1, and P2 viral supernatant and the relevant genetic regions encompassing all  
645 the insertants for a given virus were reverse-transcribed and amplified as described for Illumina sequencing.  
646 These amplicons were prepared for Nanopore sequencing using the native barcoding expansion kit (EXP-  
647 NBD104, Oxford Nanopore Technology, United Kingdom) and ligation sequencing kit (SQK-LSK109,  
648 Oxford Nanopore Technology, United Kingdom), and then sequenced on a MinION R9.4.1 flow cell  
649 (Oxford Nanopore Technology, United Kingdom) to determine the abundance of insertants in each sample  
650 and passage.

651

### 652 **Sequencing analysis of competitive outgrowth assay.**

653 Nanopore basecalling was carried out using Albacore, then aligned to reference sequence by Burrows-  
654 Wheeler Aligner. Since MinION DNA sequencing is prone to error, we identified the insertants by  
655 extracting inserts  $\geq 10$ nt in size, and extracted the number of insertions at each position. Abundance of each  
656 insertant was calculated relative to the total insertion count.

657

### 658 **Correlation analyses.**

659 Insertants represented in all three assays (library screen, peak titer, and competitive outgrowth) were  
660 analyzed for their relative fitness across assays. Since each assay used metrics with different ranges of  
661 magnitude, comparison across assays was facilitated by ranking insertants within each assay (see below)  
662 resulting in non-parametric distributions. Assays were thus compared by Spearman's correlation analysis and  
663 r values as measures of correlation are reported. \*  $P < 0.05$ .

664 *Ranking:* (a) *Library screen:* Insertants were ranked according to their raw abundance at P2 in each  
665 replicate, and then the average of the three replicates were used to define the insertants' rank. (b) *Peak titer:*  
666 Insertants were ranked by peak titer in each growth curve repeat, and the average of the three replicates  
667 were used to define the insertants' rank. (c) *Competitive outgrowth:* Insertants were ranked by magnitude of



668 expansion (input/P2) in each replicate, and the average of the three replicates were used to define the  
669 insertants' rank.  
670  
671

672 **Supplementary Materials**

673

674 **Supplementary Table S1.** Transposon mutagenesis calculations and metrics of SeV and MuV.

675 **Supplementary Figure S1.** Sequencing and transposon coverage of SeV library.

676 **Supplementary Table S2.** Most highly-represented insertants from SeV library.

677 **Supplementary Figure S2.** Sequencing and transposon coverage of MuV library.

678 **Supplementary Table S3.** Most highly-represented insertants from MuV library.

679 **Supplementary Table S4.** Transposon mutagenesis calculations and library metrics in NDV.

680 **Supplementary Table S5.** Most highly-represented insertants from NDV library.

681 **Supplementary Table S6.** Primers for generation of insertant clones.

682 **Supplementary Table S7.** SeV, MuV, and NDV rescue parameters.

683 **Supplementary Table S8.** Primers for one-step reverse-transcription and PCR of SeV, MuV, and NDV.

684

## References

1. P. A. Thibault, R. E. Watkinson, A. Moreira-Soto, J. F. Drexler, B. Lee, in *Advances in Virus Research*. (2017), vol. 98.
2. B. Rima *et al.*, ICTV Virus Taxonomy Profile: Paramyxoviridae. *Journal of General Virology* **100**, 1593-1594 (2019).
3. S. M. Beaty, B. Lee, Constraints on the Genetic and Antigenic Variability of Measles Virus. *Viruses* **8**, 109 (2016).
4. M. Tsurudome, M. Nishio, H. Komada, H. Bando, Y. Ito, Extensive antigenic diversity among human parainfluenza type 2 virus isolates and immunological relationships among paramyxoviruses revealed by monoclonal antibodies. *Virology* **171**, 38-48 (1989).
5. K. L. van Wyke Coelingh, C. C. Winter, E. L. Tierney, W. T. London, B. R. Murphy, Attenuation of bovine parainfluenza virus type 3 in nonhuman primates and its ability to confer immunity to human parainfluenza virus type 3 challenge. *J Infect Dis* **157**, 655-662 (1988).
6. H. Q. McLean, A. Parker Fiebelkorn, J. L. Temte, G. S. Wallace, Prevention of Measles, Rubella, Congenital Rubella Syndrome, and Mumps, 2013. *MMWR Recommendations & Reports* **62**, 1-35 (2013).
7. J. F. Drexler *et al.*, Bats host major mammalian paramyxoviruses. *Nature Communications* **3**, 796 (2012).
8. S. M. Beaty *et al.*, Cross-reactive and cross-neutralizing activity of human mumps antibodies against a novel mumps virus from bats. *Journal of Infectious Diseases pii: jiw53*, (2016).
9. M. O. Altman, D. Angeletti, J. W. Yewdell, Antibody Immunodominance: The Key to Understanding Influenza Virus Antigenic Drift. *Viral Immunol* **31**, 142-149 (2018).
10. Benjamin O. Fulton *et al.*, Mutational Analysis of Measles Virus Suggests Constraints on Antigenic Variation of the Glycoproteins. *Cell Reports* **11**, 1331-1338 (2015).
11. N. S. Heaton, D. Sachs, C.-J. Chen, R. Hai, P. Palese, Genome-wide mutagenesis of influenza virus reveals unique plasticity of the hemagglutinin and NS1 proteins. *Proceedings of the National Academy of Sciences* **110**, 20248-20253 (2013).
12. B. K. Rima *et al.*, Stability of the Parainfluenza Virus 5 Genome Revealed by Deep Sequencing of Strains Isolated from Different Hosts and following Passage in Cell Culture. *Journal of Virology* **88**, 3826-3836 (2014).
13. M. Mateo, C. K. Navaratnarajah, R. Cattaneo, Structural basis of efficient contagion: measles variations on a theme by parainfluenza viruses. *Curr Opin Virol* **5**, 16-23 (2014).
14. P. Plattet, R. K. Plemper, Envelope Protein Dynamics in Paramyxovirus Entry. *mBio* **4**, e00413-00413 (2013).
15. P. Calain, L. Roux, The rule of six, a basic feature for efficient replication of Sendai virus defective interfering RNA. *Journal of Virology* **67**, 4822-4830 (1993).
16. Y. Shirogane, S. Watanabe, Y. Yanagi, Cooperation between different RNA virus genomes produces a new phenotype. *Nature Communications* **3**, 1235 (2012).
17. M. Chi *et al.*, Conserved amino acids around the DIII-DI linker region of the Newcastle disease virus fusion protein are critical for protein folding and fusion activity. *BioScience Trends* **13**, 225-233 (2019).
18. B. O. Fulton, W. Sun, N. S. Heaton, P. Palese, The Influenza B Virus Hemagglutinin Head Domain Is Less Tolerant to Transposon Mutagenesis than That of the Influenza A Virus. *J Virol* **92**, (2018).

- 732 19. V. A. Avanzato *et al.*, A structural basis for antibody-mediated neutralization of Nipah virus  
733 reveals a site of vulnerability at the fusion glycoprotein apex. *Proceedings of the National*  
734 *Academy of Sciences* **116**, 25057-25067 (2019).
- 735 20. K. D. Azarm, B. Lee, Differential Features of Fusion Activation within the Paramyxoviridae.  
736 *Viruses* **12**, (2020).
- 737 21. J. C. Rassa, G. M. Wilson, G. A. Brewer, G. D. Parks, Spacing Constraints on Reinitiation  
738 of Paramyxovirus Transcription: The Gene End U Tract Acts as a Spacer to Separate Gene  
739 End from Gene Start Sites. *Virology* **274**, 438-449 (2000).
- 740 22. A. Sugai, H. Sato, M. Yoneda, C. Kai, Gene end-like sequences within the 3' non-coding  
741 region of the Nipah virus genome attenuate viral gene transcription. *Virology* **508**, 36-44  
742 (2017).
- 743 23. K. Hino *et al.*, Downregulation of Nipah virus N mRNA occurs through interaction between  
744 its 3' untranslated region and hnRNP D. *Journal of virology* **87**, 6582-6588 (2013).
- 745 24. Y. Inoue *et al.*, Selective Translation of the Measles Virus Nucleocapsid mRNA by La  
746 Protein. *Frontiers in Microbiology* **2**, (2011).
- 747 25. M. K. Lo, T. M. Sogaard, D. G. Karlin, Evolution and Structural Organization of the C  
748 Proteins of Paramyxovirinae. *PLoS ONE* **9**, e90003 (2014).
- 749 26. Y. Fujii, K. Kiyotani, T. Yoshida, T. Sakaguchi, Conserved and non-conserved regions in  
750 the Sendai virus genome: evolution of a gene possessing overlapping reading frames.  
751 *Virus genes* **22**, 47-52 (2001).
- 752 27. J. Habchi, S. Longhi, Structural disorder within paramyxovirus nucleoproteins and  
753 phosphoproteins. *Molecular BioSystems* **8**, 69-81 (2012).
- 754 28. V. D. Thakkar *et al.*, The Unstructured Paramyxovirus Nucleocapsid Protein Tail Domain  
755 Modulates Viral Pathogenesis through Regulation of Transcriptase Activity. *Journal of*  
756 *virology*, JVI.02064-02017 (2018).
- 757 29. R. M. Cox, S. A. Krumm, V. D. Thakkar, M. Sohn, R. K. Plemper, The structurally  
758 disordered paramyxovirus nucleocapsid protein tail domain is a regulator of the mRNA  
759 transcription gradient. *Science Advances* **3**, e1602350 (2017).
- 760 30. M. Dochow, S. A. Krumm, J. E. Crowe, M. L. Moore, R. K. Plemper, Independent Structural  
761 Domains in Paramyxovirus Polymerase Protein. *Journal of Biological Chemistry* **287**, 6878-  
762 6891 (2012).
- 763 31. S. M. Beaty *et al.*, Efficient and Robust Paramyxoviridae Reverse Genetics Systems.  
764 *mSphere* **2**, e00376-00316 (2017).
- 765 32. M. Habjan, N. Penski, M. Spiegel, F. Weber, T7 RNA polymerase-dependent and -  
766 independent systems for cDNA-based rescue of Rift Valley fever virus. *Journal of General*  
767 *Virology* **89**, 2157-2166 (2008).
- 768 33. J. M. Emeny, M. J. Morgan, Regulation of the Interferon System: Evidence that Vero Cells  
769 have a Genetic Defect in Interferon Production. *Journal of General Virology* **43**, 247-252  
770 (1979).
- 771 34. U. J. Buchholz, S. Finke, K.-K. Conzelmann, Generation of Bovine Respiratory Syncytial  
772 Virus (BRSV) from cDNA: BRSV NS2 Is Not Essential for Virus Replication in Tissue  
773 Culture, and the Human RSV Leader Region Acts as a Functional BRSV Genome  
774 Promoter. *Journal of Virology* **73**, 251-259 (1999).
- 775 35. X. Hou *et al.*, Mutations in Sendai virus variant F1-R that correlate with plaque formation in  
776 the absence of trypsin. *Medical Microbiology and Immunology* **194**, 129-136 (2005).
- 777 36. R. Shobana, S. K. Samal, S. Elankumaran, Prostate-specific antigen-retargeted  
778 recombinant newcastle disease virus for prostate cancer virotherapy. *Journal of virology*  
779 **87**, 3792-3800 (2013).
- 780

781 **Acknowledgments**

782 **General:** We thank Dr. W. Paul Duprex and Dr. Nancy McQueen for the kind gift of the MuV and SeV  
783 reverse genetics systems we previously modified to make this manuscript possible. Both were co-authors in  
784 the original paper describing the efficient and robust reverse genetics system that we developed (31). We  
785 also thank other members of the Lee Lab for their helpful feedback, and Dr. Benjamin tenOever for help  
786 with some of the original stream graphs. We would also like to acknowledge the genomics and flow  
787 cytometry cores at the Icahn School of Medicine at Mount Sinai.

788 **Funding:** S.M.B. and C.S. were supported by the Viral-Host Pathogenesis Training Grant T32 AI007647 at  
789 ISMMS. S.I. was supported by Fukuoka University's Clinical Hematology and Oncology Study Group  
790 (CHOT-SG) Fellowship. P.A.T. was supported by the Canadian Institutes of Health Research Postdoctoral  
791 Fellowship. The work reported in this study was supported in part by NIH grants AI115226 and AI123449  
792 to B.L.

793 **Author Contributions:** S.M.B. and B.L. conceived the experiments. S.M.B., P.A.T., A.P., S.T.W., and  
794 P.H. generated insertional libraries and carried out screening. S.M.B. carried out library rescue and  
795 passaging. S.I. performed the critical analyses, generated individual virus clones based on these analyses,  
796 and carried out competition assays. S.I. and B.L. conceived and analyzed, but S.I. executed the NDV  
797 validation screens. D.S. and C.S. aided in sequencing data analysis. C.S. wrote the code to identify the  
798 inserts from the MinION platform (Oxford Nanopore). P.A.T., S.I., and B.L. wrote the manuscript.

799 **Competing interests:** All authors declare no competing interests.

800 **Data and materials availability:** The raw next generation sequencing results are uploaded at NCBI GEO.  
801 Library screening Illumina sequencing: GSE125257 for SeV and MuV, GSE138366 for NDV. Competitive  
802 outgrowth assay Oxford Nanopore sequencing: GSE128625. SeV-eGFP and NDV-eGFP may be obtained  
803 through a MTA with Icahn School of Medicine at Mount Sinai via Mount Sinai Innovation Partners (MSIP).  
804 MuV (JL5)-eGFP needs to be requested first through Dr. W. Paul Duprex, Center for Vaccine Research,  
805 University of Pittsburg, then through the corresponding author (Dr. Benhur Lee).

806  
807

## Figures and Tables

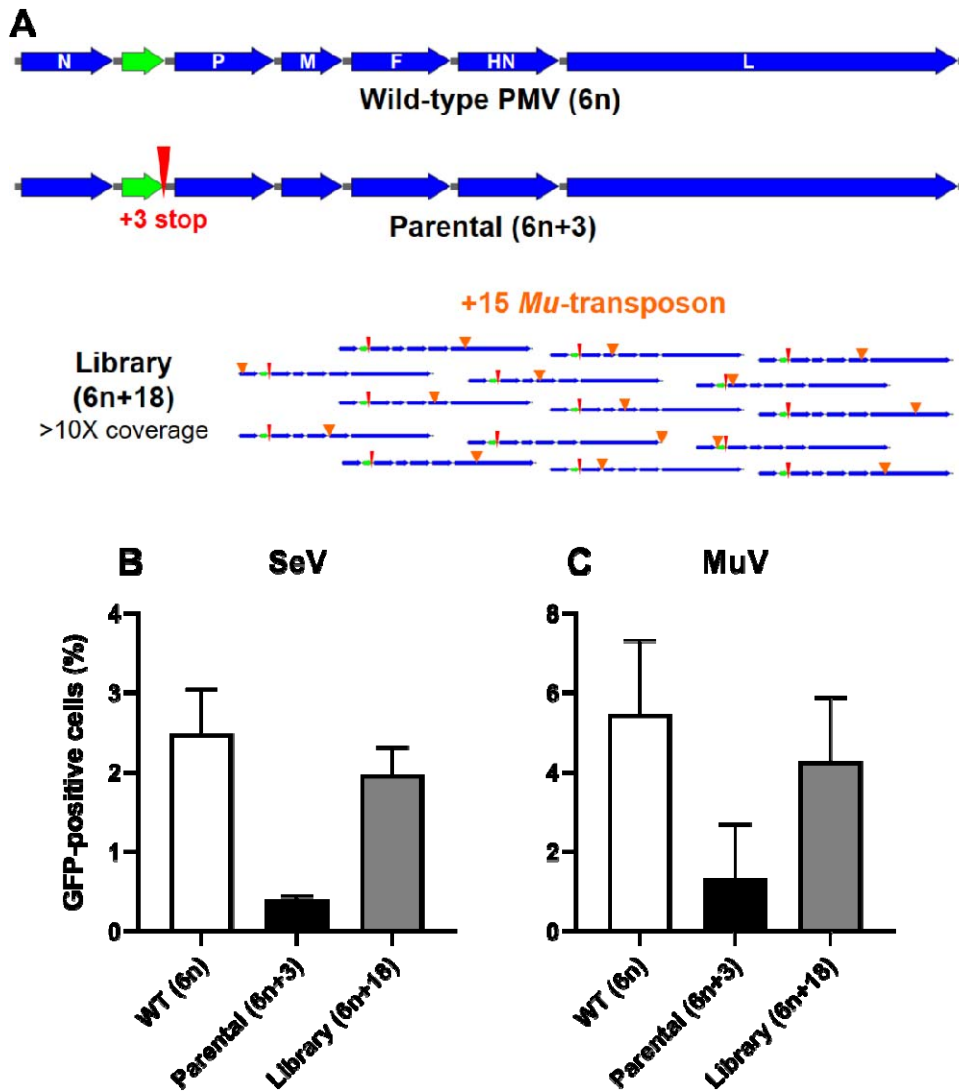

808  
809

### Figure 1. Insertional mutagenesis strategy. (A) Generation and selection of our transposon

810

**mutagenesis library.** Schematic of a generic paramyxovirus genome that conforms to rule-of-six. Wild-

811

type PMV (6n), is shown in deep blue with the additional EGFP reporter between the N and P genes shown

812

in green. The parental (6n+3) genome used for generating the transposon mutagenesis library is shown

813

below the wild-type PMV (6n) genome. Red elongated arrowhead indicates the additional stop codon (+3

814

stop). This 6n+3 genome should be rescued much less efficiently than the wild-type 6n genome. Library

815

(6n+18) shows examples of the random +15 (nt) *Mu*-transposon scar (light blue arrowheads) left in the 6n+3

816

parental genome after library generation. Each library was generated at a scale to result in >10X coverage

817 (number of individually-rescued insertants), in order to ensure that every nt position has >90% probability  
818 of having at least one transposon insertion, assuming *Mu*-transposon insertions are random. **(B-C) Relative**  
819 **rescue efficiencies of SeV (B) and MuV (C) constructs.** WT (6n), Parental (6n+3), and the transposon  
820 mutagenesis Library (6n+18) genomes from SeV and MuV were generated and rescued as described in  
821 Materials and Methods. Relative rescue efficiencies were estimated by FACS analysis and indicated on the  
822 y-axis as GFP-positive cells (%) at 48 hpi as detailed in Materials and Methods.

823

824

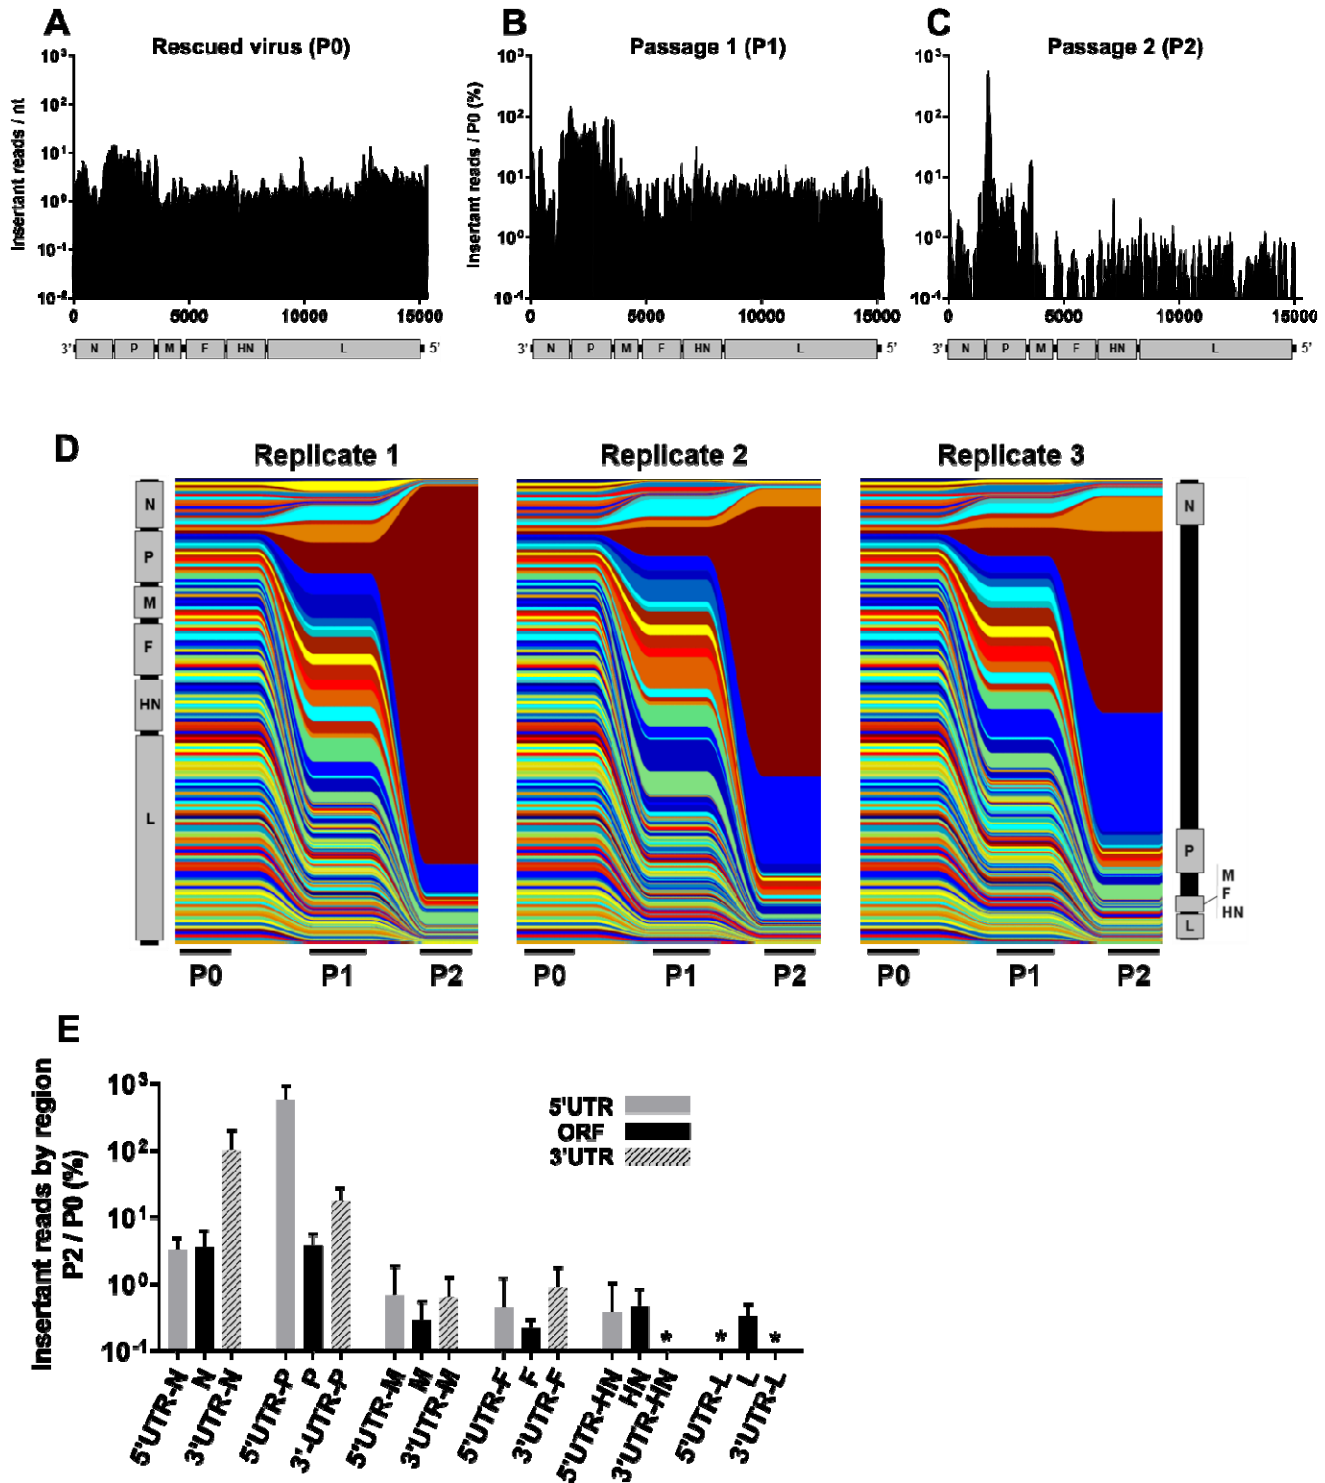

825

826 **Figure 2. SeV tolerates insertions in non-coding regions and ORFs of highly-expressed genes.**

827 Distribution of insertions in a 100nt sliding window identified at P0 (A), P1 (B), and P2 (C). To-scale

828 schematic of the SeV genome is included at the bottom of each graph, which corresponds to the numerical



829 labeling of the genomic nucleotide positions indicated on the x-axis. The y-axis for P0 (A) represents the  
830 average number of reads with a transposon scar (insert) (Insertant reads / nt) within a 100-nt sliding window  
831 surrounding the genomic nucleotide position indicated on the x-axis. P1 and P2 (B and C, respectively) y-  
832 axes are insertant reads / nt as defined in (A) averaged over three biological replicates and expressed as  
833 percent of P0 insertant reads / nt, 'Insertant reads / P0 (%)'. This normalizes the P1 and P2 results for the  
834 actual input received from P0. The enrichment or depletion of insertants is therefore a better reflection of  
835 the underlying biology and less confounded by the any potential skewing of the input population. **(D)**  
836 Stream graph showing the enrichment and/or depletion of insertants over serial passaging (P0, P1, P2) in  
837 each of the three biological replicates. Each color represents a sequential 100nt section of genome, with  
838 relative abundance at each passage represented by color height. The vertical representation of the SeV  
839 genome on the far left and right reflects the distribution of insertants across the genome at P0 and P2,  
840 respectively. **(E)** This is a bar graph representation of the P2 data in (C), but separated into the protein  
841 coding regions (ORF, black bars) and their respective non-coding regions (5' and 3' UTRs, grey and striped  
842 bars) as indicated on the x-axis. Data are shown as the normalized averaged 'Insertant reads in P2 / /P0 (%)'  
843 (y-axis) in each of the ORFs and UTRs. Error bars indicate standard deviation. \* indicates values below  
844 0.1%.  
845

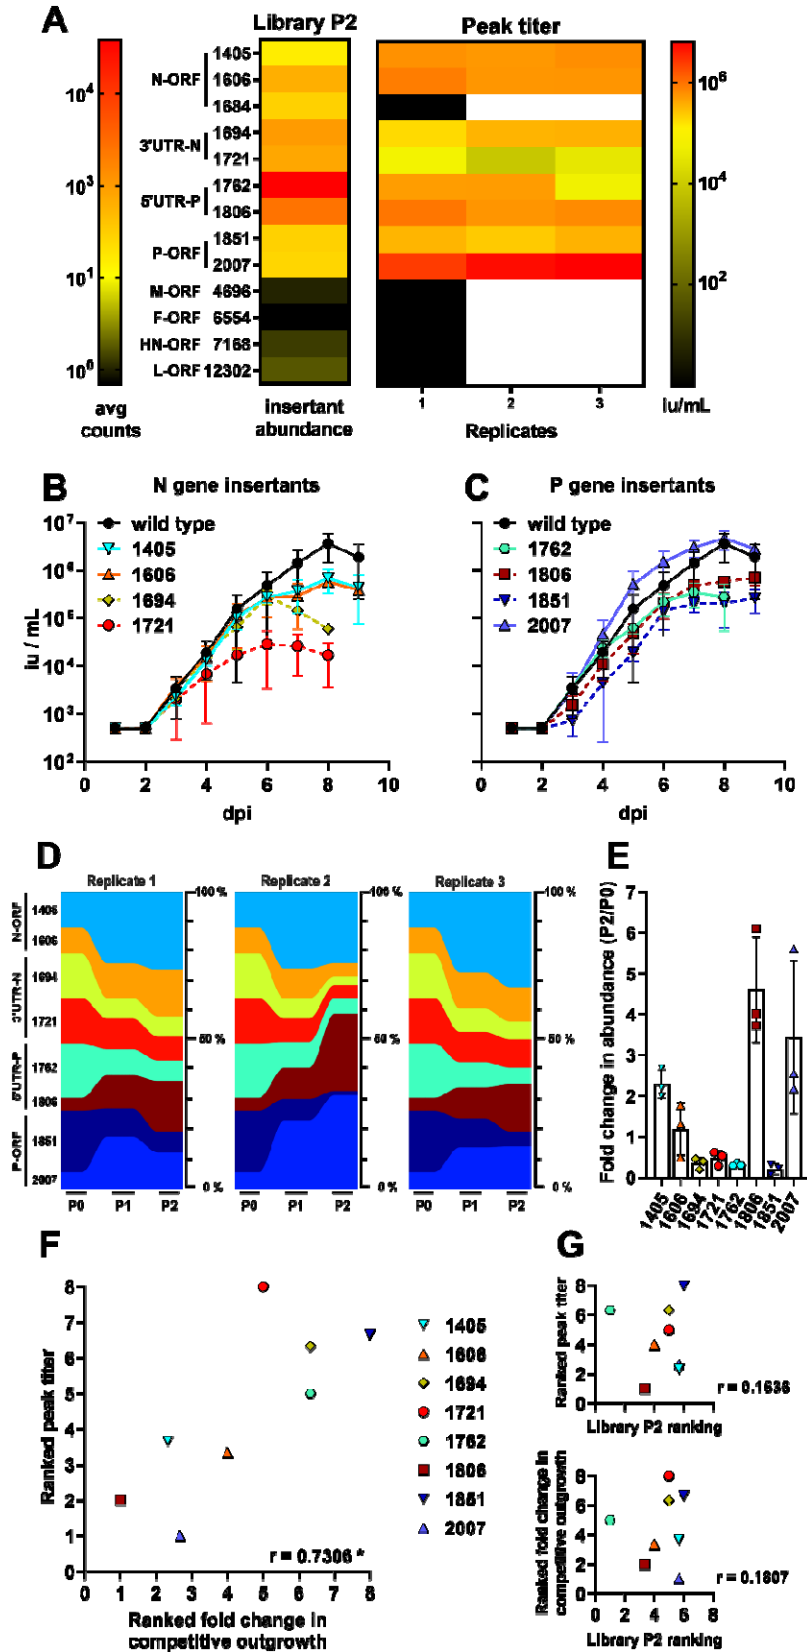

847 **Figure 3. SeV insertant peak titer production predicts fitness in a competitive outgrowth assay. (A)**  
848 Heat-map comparison of the abundance of select insertants in P2 from our NGS data (left, library P2), and  
849 peak titers of highly-represented insertants that were selected for individual confirmation as a recombinant  
850 parental virus (6n+3) bearing that particular insertion (+15) (right, Peak titer). Peak titers are indicated from  
851 three independent growth curves (Replicates 1, 2, 3). Black blocks in the heat map indicate insertants that  
852 failed to produce detectable virus in rescue and so could not be used for any further replicates (indicated by  
853 following white blocks). The color-intensity scale for the heat maps comparing the relative abundance of  
854 insertants in P2 (avg counts), and the peak titers of selected insertants described above, are indicated on the  
855 left and right sides, respectively. **(B and C)** Multicycle growth curves of select insertants in the N and P  
856 gene regions on Vero cells inoculated with an moi of 0.01. Data are from three independent experiments;  
857 mean +/- S.D. are shown as infectious units/ml (iu/ml; y-axis) at the indicated dpi (x-axis). **(D)** Multiplex  
858 competitive outgrowth assays on Vero cells, using the insertants characterized from (B) and (C) at a total  
859 moi of 0.01. Inoculum and passaging is described in Materials and Methods. Data from three independent  
860 replicates are shown as stream graphs: height of color represents the relative abundance (% of total viruses)  
861 of the indicated insertants at each passage. **(E)** Bar graph of fold enrichment in % abundance of each  
862 insertant from input (P0) to P2 of the competitive outgrowth assay in (D). **(F and G)** Comparison of fitness  
863 by each of the three major assays by average ranking of the insertants from most fit (1) to least fit (8) in  
864 each assay replicate, and their correlation by Spearman non-parametric analysis. \* P < 0.05. Ranking is  
865 described in Materials and Methods. See the text and Materials and Methods for relevant details.  
866

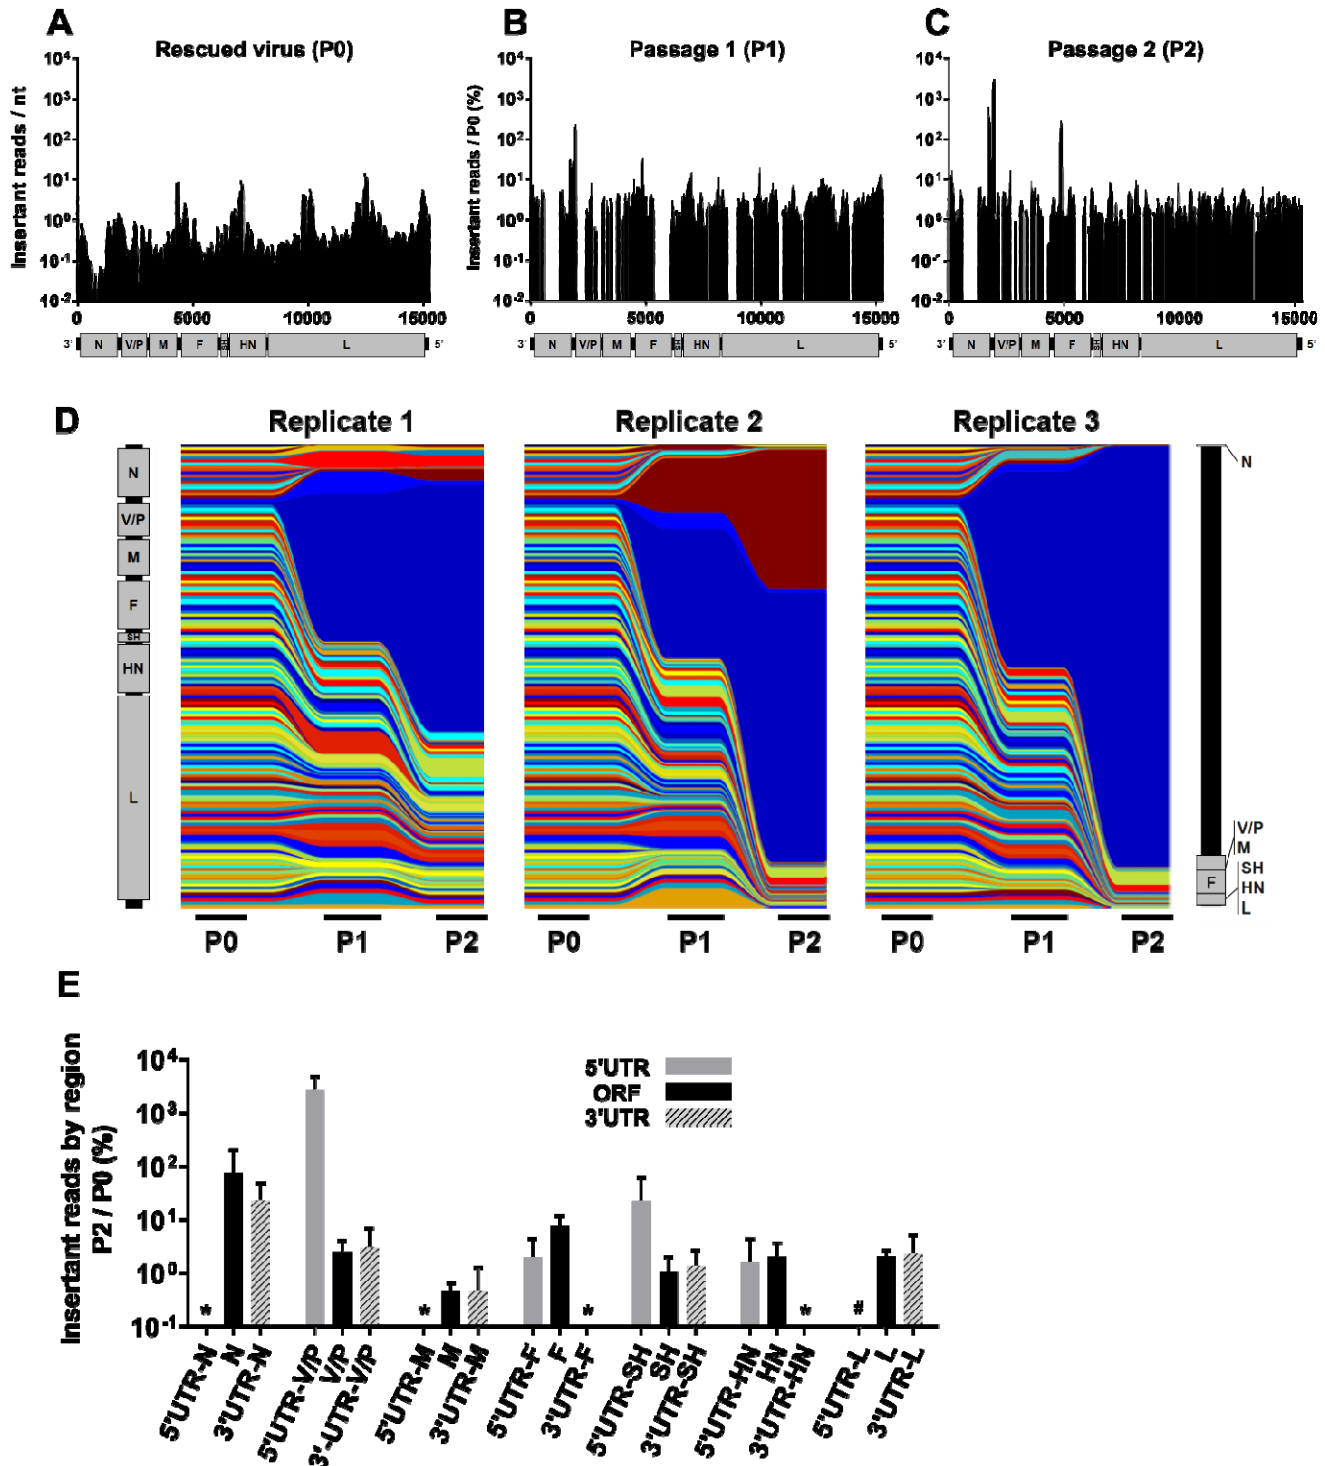

867

868 **Figure 4. MuV tolerates insertions in non-coding regions and N and F ORFs.** Distribution of insertions  
 869 in a 100nt sliding window identified at P0 (A), P1 (B), and P2 (C). To-scale schematic of the MuV genome  
 870 is included at the bottom of each graph, which corresponds to the numerical labeling of the genomic  
 871 nucleotide positions indicated on the x-axis. The y-axis for (A), Insertant reads/nt, and for (B-C), Insertant

872 reads/P0 (%), are defined as in Fig. 2A-C. **(D)** Stream graph showing the enrichment and/or depletion of  
873 insertants over serial passaging (P0, P1, P2) in each of the three biological replicates, as described for SeV  
874 in Fig. 2D. The vertical representation of the MuV genome on the far left and right reflects the distribution  
875 of insertants across the genome at P0 and P2, respectively. **(E)** This is a bar graph representation of the P2  
876 data in (C) but separated into the protein coding regions (ORF, black bars) and their respective non-coding  
877 regions (5' and 3' UTRs, grey and striped bars) as indicated on the x-axis. Bars represent normalized  
878 averaged 'Insertant Mutant reads in P2/P0 (%)' +/- S.D. in the indicated genomic regions. \* indicates values  
879 below 0.1%.  
880

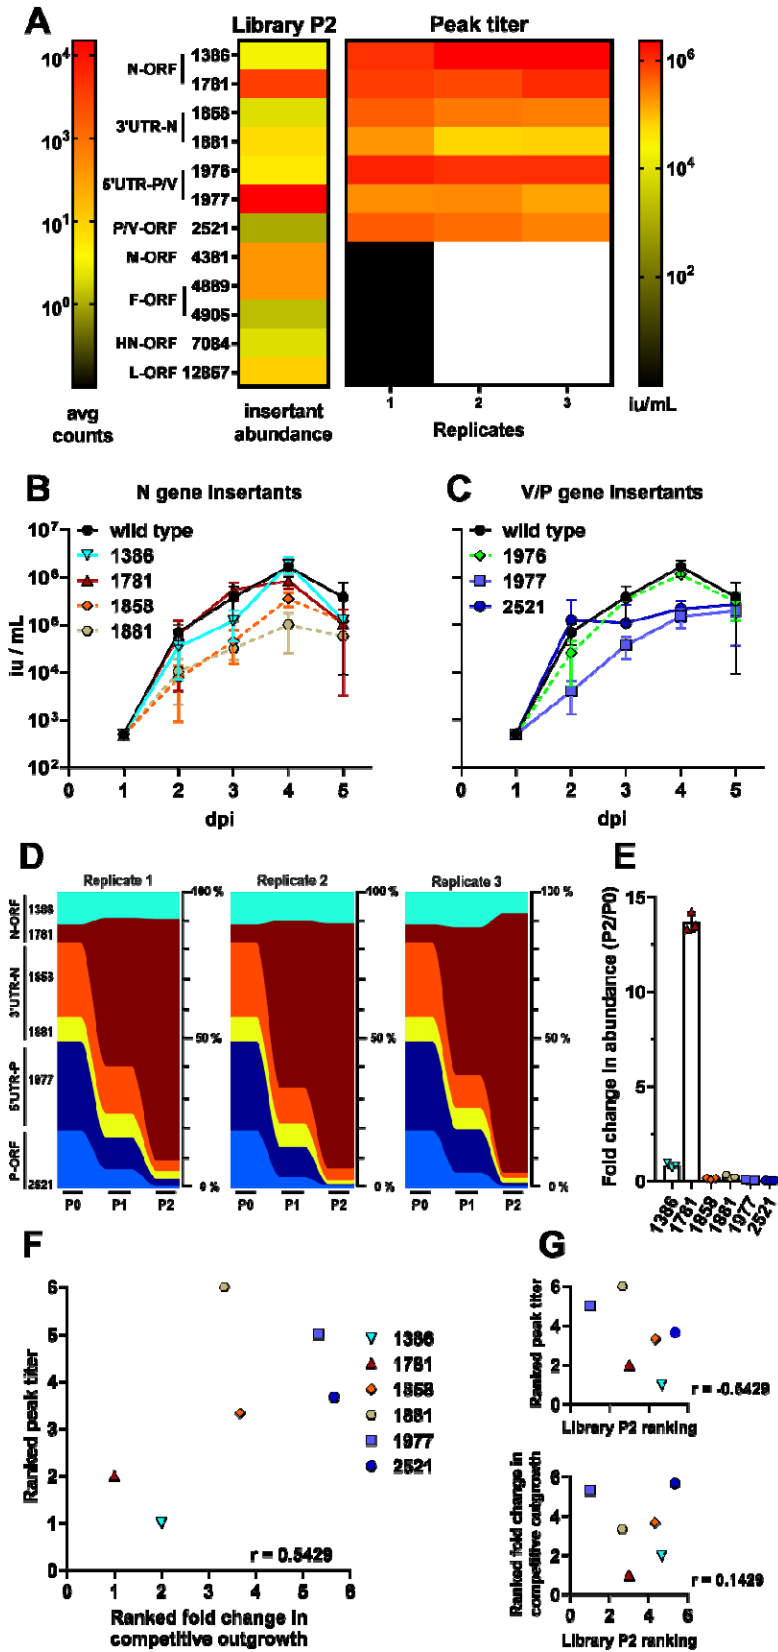

882 **Figure 5. The relative abundance of insertants in the N/P gene regions of MuV from the library P2**  
883 **correlates with the viability and replicative fitness of those individual insertants.** (A) Relative  
884 abundance of selected insertants in the mutagenesis library after P2 (left, Library P2 column), and their peak  
885 titers following rescue and amplification as described in Fig. 3A (right, Peak titer columns), are shown as a  
886 heat-map for comparison purposes. The color intensity scale for insertant abundance in Library P2 (avg  
887 counts) and the peak titers of the selected insertants are indicated on the left and right sides, respectively. (B  
888 and C) Multicycle growth curves of MuV N-insertants (B) and P-insertants (C) gene regions were generated  
889 on Vero cells as described for SeV in Fig. 3B-C. Data are shown as mean +/- S.D. (iu/ml) from three  
890 independent experiments at the indicated dpi. (D) Multiplex competitive outgrowth assays on Vero cells,  
891 using the MuV insertants characterized from (B) and (C), and carried out as described in Materials and  
892 Methods. Stream graphs showing the data from three independent replicates are shown: height of each color  
893 stream represents the relative abundance (% of total viruses) of the indicated insertants at each passage. (E)  
894 Bar graph of fold enrichment in % abundance of each insertant from input (P0) to P2 of the competitive  
895 outgrowth assay in (D). (F and G) Comparison of fitness by each of the three major assays by average  
896 ranking of the insertants from most fit (1) to least fit (6) in each assay replicate, and their correlation by  
897 Spearman non-parametric analysis. Ranking is described in Materials and Methods. See the text and  
898 Materials and Methods for relevant details.  
899

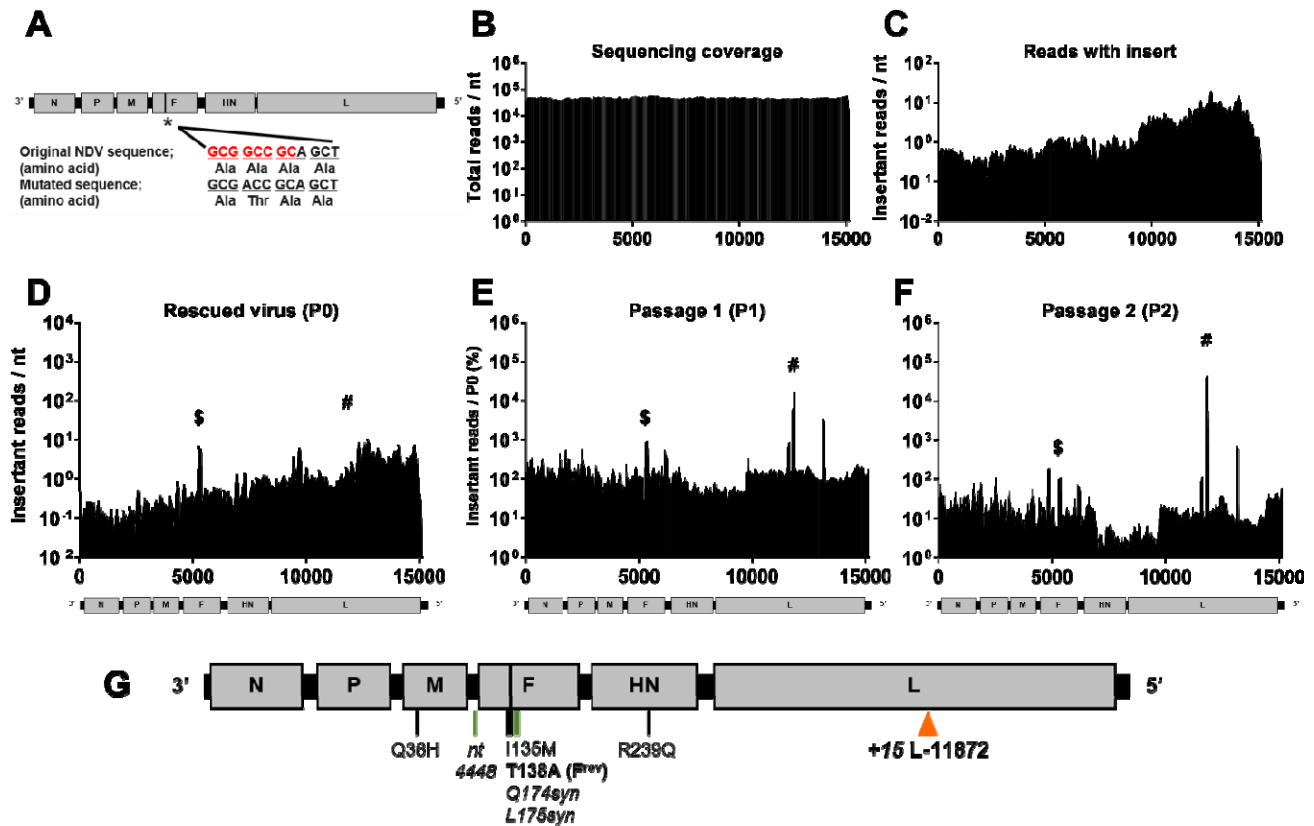

900

901

902

903

904

905

906

907

908

909

910

911

912

**Figure 6. Insertional mutagenesis of fusion-defective Newcastle disease virus (NDV<sup>Fmut</sup>) selects for rare insertants in F and L genes stochastically associated with replicative fitness.** (A) Elimination of the NotI restriction site (red sequence) in the NDV (6n+3) plasmid DNA with a single nucleotide change and concomitant mutation (\*) Ala138Thr in the fusion peptide of F to generate NDV<sup>Fmut</sup> (6n+3) for library generation. The vertical black bar in F indicates the location of the fusion peptide. (B) Total number of reads (y-axis) at each nucleotide position in the SeV genome, regardless of transposon detection, from the input plasmid. (C-F) Transposon insertion distribution within a 100nt sliding window, identified in (C) the NDV<sup>Fmut</sup> plasmid DNA library input, (D) P0 (E) P1, and (F) P2. A to-scale schematic of the NDV genome is included under each graph defined as in Figs 2A-C and 4A-C. The y-axis in (C) and (D) represents the average number of reads containing an insertion (insertions per nt) at each nt position within a sliding 100-nt window surrounding the genome nt position on the x-axis. (E) P1 and (F) P2 y-axes, respectively, are normalized to the average read counts per nucleotide over three replicates expressed as percent of P0 input



913 in (D) as was described for Figs 2B and 2C. Throughout (F and G), <sup>\$</sup> indicates the insertants surrounding  
914 position 5383, and <sup>#</sup> indicates the insertants surrounding nts 11867-11877. **(G)** To-scale genome of the  
915 plaque-purified NDV-L-11872 clone. The fusion peptide is indicated by the black bar within F, as in (A)  
916 above. Transposon insertion at L-11872 is indicated by an orange arrow. Adaptive point mutations are  
917 indicated below the genome; green bars indicate mutations that do not affect amino acid sequence. T138A  
918 reverts the F<sup>mut</sup> back to the wild-type, fusion-competent (F<sup>rev</sup>) sequence.
